# Supplementary material for: Factors associated with inpatient length of stay among hospitalised patients with chronic obstructive pulmonary disease, China, 2016–2017: a retrospective study
Source: PubMed Central journal article supplement — BMJ Open. 2021 Feb 5;11(2):e040560. doi: 10.1136/bmjopen-2020-040560 (PMC7925858; doi:10.1136/bmjopen-2020-040560), 2021-02-05
Supplement: bmjopen-2020-040560.draft_revisions.pdf [file bmjopen-2020-040560.draft_revisions.pdf]

# BMJ Open

BMJ Open is committed to open peer review. As part of this commitment we make the peer review history of every article we publish publicly available.

When an article is published we post the peer reviewers' comments and the authors' responses online. We also post the versions of the paper that were used during peer review. These are the versions that the peer review comments apply to.

The versions of the paper that follow are the versions that were submitted during the peer review process. They are not the versions of record or the final published versions. They should not be cited or distributed as the published version of this manuscript.

BMJ Open is an open access journal and the full, final, typeset and author-corrected version of record of the manuscript is available on our site with no access controls, subscription charges or pay-per-view fees (<http://bmjopen.bmj.com>).

If you have any questions on BMJ Open's open peer review process please email [info.bmjopen@bmj.com](mailto:info.bmjopen@bmj.com)

# BMJ Open

## Factors Associated with Inpatient Length of Stay among Hospitalized Patients with Chronic Obstructive Pulmonary Disease, China, 2016-2017: a retrospective study

|                               |                                                                                                                                                                                                                                                                                                                                                                                                                                                                                                                                                                                                                                                                                                                                                                                                                                                                                                                                                                                                                                                                                                                                                                                                                                                                                                                                                                                                                                                                                                                                                                                                                                                                                                                                                                                                                                                  |
|-------------------------------|--------------------------------------------------------------------------------------------------------------------------------------------------------------------------------------------------------------------------------------------------------------------------------------------------------------------------------------------------------------------------------------------------------------------------------------------------------------------------------------------------------------------------------------------------------------------------------------------------------------------------------------------------------------------------------------------------------------------------------------------------------------------------------------------------------------------------------------------------------------------------------------------------------------------------------------------------------------------------------------------------------------------------------------------------------------------------------------------------------------------------------------------------------------------------------------------------------------------------------------------------------------------------------------------------------------------------------------------------------------------------------------------------------------------------------------------------------------------------------------------------------------------------------------------------------------------------------------------------------------------------------------------------------------------------------------------------------------------------------------------------------------------------------------------------------------------------------------------------|
| Journal:                      | <i>BMJ Open</i>                                                                                                                                                                                                                                                                                                                                                                                                                                                                                                                                                                                                                                                                                                                                                                                                                                                                                                                                                                                                                                                                                                                                                                                                                                                                                                                                                                                                                                                                                                                                                                                                                                                                                                                                                                                                                                  |
| Manuscript ID                 | bmjopen-2020-040560                                                                                                                                                                                                                                                                                                                                                                                                                                                                                                                                                                                                                                                                                                                                                                                                                                                                                                                                                                                                                                                                                                                                                                                                                                                                                                                                                                                                                                                                                                                                                                                                                                                                                                                                                                                                                              |
| Article Type:                 | Original research                                                                                                                                                                                                                                                                                                                                                                                                                                                                                                                                                                                                                                                                                                                                                                                                                                                                                                                                                                                                                                                                                                                                                                                                                                                                                                                                                                                                                                                                                                                                                                                                                                                                                                                                                                                                                                |
| Date Submitted by the Author: | 16-May-2020                                                                                                                                                                                                                                                                                                                                                                                                                                                                                                                                                                                                                                                                                                                                                                                                                                                                                                                                                                                                                                                                                                                                                                                                                                                                                                                                                                                                                                                                                                                                                                                                                                                                                                                                                                                                                                      |
| Complete List of Authors:     | <p>Dong, Fen; Institute of Clinical Medical Sciences, China-Japan Friendship Hospital,</p> <p>Huang, Ke; China-Japan Friendship Hospital, Department of Pulmonary and Critical Care Medicine; National Clinical Research Center for Respiratory Diseases</p> <p>Ren, Xiaoxia; China-Japan Friendship Hospital, Department of Pulmonary and Critical Care Medicine; National Clinical Research Center for Respiratory Diseases</p> <p>Qumu, Shiwei; China-Japan Friendship Hospital, Department of Pulmonary and Critical Care Medicine; National Clinical Research Center for Respiratory Diseases</p> <p>Niu, Hongtao; China-Japan Friendship Hospital, Department of Pulmonary and Critical Care Medicine; National Clinical Research Center for Respiratory Diseases</p> <p>Wang, Yanyan; China-Japan Friendship Hospital, Department of Medical Records</p> <p>Li, Yong; China-Japan Friendship Hospital, Department of Pulmonary and Critical Care Medicine; National Clinical Research Center for Respiratory Diseases</p> <p>Lu, Minya; Peking Union Medical College Hospital, Chinese Academy of Medical Sciences, Department of Clinical Laboratory</p> <p>Lin, Xinshan; China-Japan Friendship Hospital, Department of Pulmonary and Critical Care Medicine; Chinese Academy of Medical Sciences &amp; Peking Union Medical College, Graduate School of Peking Union Medical College</p> <p>Yang, Ting; China-Japan Friendship Hospital, Department of Pulmonary and Critical Care Medicine; National Clinical Research Center for Respiratory Diseases</p> <p>Jiao, Jianjun; China-Japan Friendship Hospital, Department of Medical Administration</p> <p>Wang, Chen; China-Japan Friendship Hospital, Department of Pulmonary and Critical Care Medicine; Chinese Academy of Medical Sciences &amp; Peking Union Medical College</p> |
| Keywords:                     | Chronic airways disease < THORACIC MEDICINE, Epidemiology < THORACIC MEDICINE, Risk management < HEALTH SERVICES ADMINISTRATION & MANAGEMENT                                                                                                                                                                                                                                                                                                                                                                                                                                                                                                                                                                                                                                                                                                                                                                                                                                                                                                                                                                                                                                                                                                                                                                                                                                                                                                                                                                                                                                                                                                                                                                                                                                                                                                     |
|                               |                                                                                                                                                                                                                                                                                                                                                                                                                                                                                                                                                                                                                                                                                                                                                                                                                                                                                                                                                                                                                                                                                                                                                                                                                                                                                                                                                                                                                                                                                                                                                                                                                                                                                                                                                                                                                                                  |

1  
2  
3  
4  
5  
6  
7  
8  
9  
10  
11  
12  
13  
14  
15  
16  
17  
18  
19  
20  
21  
22  
23  
24  
25  
26  
27  
28  
29  
30  
31  
32  
33  
34  
35  
36  
37  
38  
39  
40  
41  
42  
43  
44  
45  
46  
47  
48  
49  
50  
51  
52  
53  
54  
55  
56  
57  
58  
59  
60

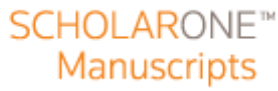

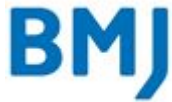

I, the Submitting Author has the right to grant and does grant on behalf of all authors of the Work (as defined in the below author licence), an exclusive licence and/or a non-exclusive licence for contributions from authors who are: i) UK Crown employees; ii) where BMJ has agreed a CC-BY licence shall apply, and/or iii) in accordance with the terms applicable for US Federal Government officers or employees acting as part of their official duties; on a worldwide, perpetual, irrevocable, royalty-free basis to BMJ Publishing Group Ltd ("BMJ") its licensees and where the relevant Journal is co-owned by BMJ to the co-owners of the Journal, to publish the Work in this journal and any other BMJ products and to exploit all rights, as set out in our [licence](#).

The Submitting Author accepts and understands that any supply made under these terms is made by BMJ to the Submitting Author unless you are acting as an employee on behalf of your employer or a postgraduate student of an affiliated institution which is paying any applicable article publishing charge ("APC") for Open Access articles. Where the Submitting Author wishes to make the Work available on an Open Access basis (and intends to pay the relevant APC), the terms of reuse of such Open Access shall be governed by a Creative Commons licence – details of these licences and which [Creative Commons](#) licence will apply to this Work are set out in our licence referred to above.

Other than as permitted in any relevant BMJ Author's Self Archiving Policies, I confirm this Work has not been accepted for publication elsewhere, is not being considered for publication elsewhere and does not duplicate material already published. I confirm all authors consent to publication of this Work and authorise the granting of this licence.

1  
2  
3 **Factors Associated with Inpatient Length of Stay among**  
4  
5  
6 **Hospitalized Patients with Chronic Obstructive Pulmonary**  
7  
8 **Disease, China, 2016-2017: a retrospective study**  
9

10  
11 Fen Dong<sup>1</sup>, Ke Huang<sup>2</sup>, Xiaoxia Ren<sup>2</sup>, Shiwei Qumu<sup>2</sup>, Hongtao Niu<sup>2</sup>, Yanyan Wang<sup>3</sup>, Yong  
12  
13 Li<sup>2</sup>, Minya Lu<sup>4</sup>, Xinshan Lin<sup>2,5</sup>, Ting Yang<sup>2\*</sup>, Jianjun Jiao<sup>6\*</sup>, Chen Wang<sup>2,7</sup>  
14  
15

16  
17 \***Co-corresponding authors:** Ting Yang and Jianjun Jiao contributed equally to this  
18  
19 paper as co-corresponding authors.  
20  
21

22  
23  
24 **Affiliations:**  
25

26 <sup>1</sup>Institute of Clinical Medical Sciences, China–Japan Friendship Hospital, Beijing, China;  
27

28 <sup>2</sup>Department of Pulmonary and Critical Care Medicine, China-Japan Friendship Hospital;  
29  
30 National Clinical Research Center for Respiratory Diseases; Institute of Respiratory  
31  
32 Medicine, Chinese Academy of Medical Science, Beijing, China;  
33

34 <sup>3</sup>Department of Medical Records, China–Japan Friendship Hospital, Beijing, China;  
35

36 <sup>4</sup>Department of Clinical Laboratory, Peking Union Medical College Hospital, Chinese  
37  
38 Academy of Medical Sciences, Beijing, China;  
39

40 <sup>5</sup>Graduate School of Peking Union Medical College, Chinese Academy of Medical  
41  
42 Sciences & Peking Union Medical College, Beijing, China;  
43

44 <sup>6</sup>Department of Medical Administration, China–Japan Friendship Hospital, Beijing,  
45  
46 China;  
47

48 <sup>7</sup>Chinese Academy of Medical Sciences & Peking Union Medical College, Beijing, China.  
49  
50

51  
52  
53 **Correspondence:** Ting Yang  
54  
55  
56

1  
2  
3 Department of Pulmonary and Critical Care Medicine, China-Japan Friendship Hospital;  
4  
5 National Clinical Research Center for Respiratory Diseases; Institute of Respiratory  
6  
7 Medicine, Chinese Academy of Medical Science. No 2, East Yinghua Road, Chaoyang  
8  
9 District, Beijing, China  
10

11 Tel : +010 8420 6273

12  
13 Email : dryangting@qq.com  
14  
15

16  
17  
18 **Word count** : 2613, excluding the title page, abstract, tables, acknowledgements,  
19  
20 contributions and references.  
21  
22  
23  
24  
25  
26  
27  
28  
29  
30  
31  
32  
33  
34  
35  
36  
37  
38  
39  
40  
41  
42  
43  
44  
45  
46  
47  
48  
49  
50  
51  
52  
53  
54  
55  
56  
57  
58  
59  
60

## ABSTRACT

**Objectives:** To identify factors associated with length of stay (LOS) in Chronic obstructive pulmonary disease (COPD) hospitalized patients, which may help shorten LOS and reduce economic burden accrued over hospital stay.

**Design:** A retrospective cohort study

**Setting:** This study was performed in a tertiary hospital in China.

**Participants:** New COPD patients who were aged  $\geq 40$  years and admitted between 2016 and 2017.

**Primary and secondary outcome measures:** LOS at initial admission was the primary outcome and health expenditures were the secondary outcome. To identify factors associated with LOS, we collected information at index hospitalization and constructed a conceptual model using directed acyclic graph (DAG). Potential factors were grouped into five blocks: demographic information, disease severity, comorbidities, hospital and environmental factors. Negative binomial regression model was fitted for each block of factors and then a parsimonious analysis was performed.

**Results:** Totally, we analyzed 565 COPD patients. The mean $\pm$ SD age was 69 $\pm$ 11 years old and 69.4% were male. The median LOS was 10 days with an interquartile range of 8-14 days. In modelling each block of factors, venous thromboembolism (rate ratio [RR] =1.38, 95% confidence interval (CI): 1.07-1.76), pulmonary encephalopathy (RR=1.53, 95%CI: 1.06-2.20), respiratory infection (RR=1.12, 95%CI: 1.01-1.24), osteoporosis (RR=1.45, 95%CI: 1.07-1.96), and emergence admission (RR=1.08, 95%CI: 1.01-1.16) were associated with longer LOS. In parsimonious analysis, all the aforementioned factors remained significant except emergency admission, strengthening their associations with hospital stay. Additionally, total hospitalization cost and patients' out-of-pocket cost increased monotonically with LOS (both  $P_{\text{trend}} < 0.0001$ ).

1  
2  
3 **Conclusion:** Patients' concomitant morbidities predicted excessive LOS in COPD  
4 patients. Hospitalization healthcare cost increased over the length of stay. Quality  
5 improvement initiatives may need to identify patients at high risk of longer stay and  
6 implement early interventions such as thromboprophylaxis to avoid lengthy stay, which  
7 could help reduce the high economic burden of COPD.  
8  
9  
10  
11  
12

13  
14  
15  
16 **Keywords:** Pulmonary disease, Chronic obstructive; Length of Stay; Risk Factors; DAG  
17  
18  
19

## 20 **Article Summary**

### 21 **Strengths and limitations of this study**

- 22 ● LOS and economic burden were analyzed in newly admitted COPD patients in  
23 developing countries.
- 24 ● The primary data analysis was based on conceptual model and theoretical model  
25 driven
- 26 ● Real experiences of hospitalized patients in the real-world clinical setting were  
27 analyzed
- 28 ● Analysis in this single center study may not reflect the comprehensive profile of LOS  
29 in Chinese patients.  
30  
31  
32  
33  
34  
35  
36  
37  
38  
39  
40  
41  
42  
43  
44  
45  
46  
47  
48  
49  
50  
51  
52  
53  
54  
55  
56  
57  
58  
59  
60



## INTRODUCTION

Chronic obstructive pulmonary disease (COPD) is a burdensome chronic respiratory disease. It's estimated to cause 2.6% Disability-Adjusted Life Years (DALYs) globally and ranked as the third top cause of DALYs in China.<sup>1</sup> The prevalence of COPD in Chinese adults is 8.6%, with approximately 100 million COPD patients.<sup>2</sup> People aged over 40 years are particularly at high risk due to its onset in later life. During COPD progress, acute worsening respiratory symptoms can be easily triggered,<sup>3,4</sup> leading to hospitalizations and increased use of health service.<sup>5</sup> Spending on hospital-based care constitute the major healthcare cost in COPD patients, accounting for 65.9%-77% of medical costs in China.<sup>6,7</sup> The direct medical cost of COPD was estimated at \$1732.24 per patient annually in 2006<sup>8,9</sup> and hospitalization cost per admission increased to \$3669.33 in 2016.<sup>10</sup> COPD is also a costly disease in developed countries. In US, it consumes \$72 billion in direct healthcare cost each year<sup>11</sup> and the tremendous cost is projected to be on the rise.<sup>11,12</sup> Given the large prevalent population and substantial economic burden imposed by COPD, interventions targeted to hospitalization are needed. Hospital stay is an important outcome for health care systems<sup>13</sup> and indicates the acute impact of exacerbation on patients.<sup>14</sup> Length of stay (LOS) correlates with hospitalization cost.<sup>15</sup> Shortening LOS might be one way to slow down the escalating healthcare cost.

Owing to disparities in healthcare systems or service use, there exists a high heterogeneity of LOS across countries.<sup>12,16,17</sup> In China, some patients stay longer under certain circumstances, eg, discharged and readmitted on the same day due to complicated conditions, prolonging their actual stay for the same hospitalization. Two prior studies in Chinese COPD patients demonstrated that respiratory coinfection and eosinopenia were associated with longer stay.<sup>14,18</sup> However, these studies focused more on single exposure-outcome relationship between one risk factor of interest and LOS. The lengthy stay is multifactorial and a diversity of factors can contribute to prolonged LOS, such as poor

1  
2  
3 patients' health status, complicated disease conditions, and organization operation et  
4 al.<sup>17,19-22</sup> Some of these factors are related to health system and some are at patient level.  
5  
6  
7 To effectively reduce LOS and COPD disease burden, it's of paramount importance to  
8  
9 identify important factors associated with LOS.  
10

11 Thus, we conducted a retrospective longitudinal study in COPD patients who were  
12 newly admitted to National Clinical Research Center for Respiratory Diseases (NCRCD),  
13 a 354-bed, medical and clinical research center in a tertiary hospital in Beijing, China. To  
14 comprehensively analyze factors associated with hospital stay, we performed a  
15 hypothesis-driven analysis by constructing a conceptual model using directed acyclic  
16 graph (DAG). We hypothesized individuals with the aforementioned risk factors were at  
17 increased risk for lengthy stay. This was the first clinical epidemiological study to examine  
18 factors associated with LOS in Chinese COPD inpatients by the use of conceptual model.  
19 It provided some new information about health-care for COPD patients in developing  
20 countries and might offer one way to reduce the heavy burden of COPD.  
21  
22  
23  
24  
25  
26  
27  
28  
29  
30  
31  
32  
33  
34

## 35 **METHODS**

36  
37 We retrospectively analyzed patients consecutively admitted between Jan.1st 2016 to  
38 Dec.31th 2017. The eligible patients were Chinese inpatients with primary diagnosis of  
39 COPD at initial admission in respiratory units,  $\geq 40$  years, undergoing pulmonary function  
40 testing, and not hospitalized for COPD in preceding one year. Considering the goal to  
41 identify patients at high risk of prolonged hospital stay, patients discharged against  
42 medical advice were excluded. To ensure that patients were not hospitalized due to COPD  
43 in previous one year, data on hospitalizations in 2015 were collected as well. Patients  
44 once hospitalized for COPD in 2015 were excluded to remove the influence of preceding  
45 COPD admissions within 12 months on the first admission,<sup>20</sup> Patients staying longer than  
46 30 days were also excluded.  
47  
48  
49  
50  
51  
52  
53  
54  
55  
56  
57

1  
2  
3 All diagnoses, including primary and five secondary diagnoses, were determined  
4 by International Classification of Diseases, 10th Revision (ICD10) coding system. COPD  
5 was defined as J40-J44 in ICD-10 codes. Unique individuals with primary diagnosis of  
6 COPD at index admission were identified. To guarantee accuracy of ICD10 coding,  
7 diagnoses were ascertained by checking details in medical records.  
8  
9  
10  
11  
12  
13  
14  
15

### 16 **Hospital stays**

17  
18 LOS was calculated as days by subtracting the admission date from discharge date at the  
19 index admission, which was the initial hospital stay. For patients readmitted frequently  
20 during study period, their initial hospital stays were included for analyses. If patients were  
21 discharged and readmitted on the same day, the readmissions were recorded as the same  
22 hospitalization as the initial one. LOS for the same-day discharge and readmission were  
23 calculated as the summed days of hospital stay in each consecutive admission.  
24  
25  
26  
27  
28  
29  
30  
31  
32

### 33 **Direct economic burden**

34  
35 As data on days off from work due to COPD disabling effect were unavailable, we only  
36 analysed direct health care expenditures during hospitalization for COPD economic  
37 burden. Information on total costs and patients' out-of-pocket costs were obtained and  
38 converted to U.S. dollars using annual currency exchange rate in 2017 (1 dollar=6.7518  
39 yuan).<sup>23</sup>  
40  
41  
42  
43  
44  
45  
46  
47

### 48 **Potential factors**

49  
50 COPD is a complex disease involving airflow obstruction and multisystem diseases,<sup>24</sup> We  
51 combined secondary diagnoses to characterize COPD's concomitant diseases, including  
52 comorbidities and complications according to guidelines<sup>25</sup> and researches.<sup>24,26-28</sup>  
53  
54 Comorbidities were cardio/cerebro-vascular diseases, diabetes, respiratory infection,  
55  
56  
57  
58  
59  
60

1  
2  
3 bronchiectasis, gastroesophageal reflux, obstructive sleep apnea syndrome (OSAS), lung  
4 cancer, depression or anxiety, and osteoporosis. Complications included respiratory  
5 failure, pulmonary heart diseases, hypoxemia, venous thromboembolism (VTE),  
6 pneumothorax and pulmonary encephalopathy. As particulates in the air can trigger  
7 worsening respiratory symptoms and lead to emergency visiting or hospitalization,<sup>29-31</sup> we  
8 collected data on ambient air pollutants at admission. Data on daily concentrations of  
9 particulate matter with a diameter of  $<2.5 \mu\text{m}$  ( $\text{PM}_{2.5}$ ) and ozone were obtained from the  
10 Environment Monitoring Station nearest to the study site. Considering the varying air  
11 pollutant concentrations across seasons and potential impact of seasonal changes  
12 (temperatures, humidity),<sup>32</sup> we also analyzed seasons when the admissions occurred.  
13  
14 Emergency admission and day of week of admission were analyzed as hospital factors.  
15  
16 The weekday of admission was dichotomized into Thursday-Sunday and Monday-  
17  
18  
19  
20  
21  
22  
23  
24  
25  
26  
27  
28  
29  
30  
31  
32  
33  
34  
35  
36  
37  
38  
39  
40  
41  
42  
43  
44  
45  
46  
47  
48  
49  
50  
51  
52  
53  
54  
55  
56  
57  
58  
59  
60  
Wednesday.

### **Patient and public involvement**

Patients were not involved in this retrospective study.

### **Statistics**

Data were summarized as number (percentage) for categorical variables and mean $\pm$ SD or median (interquartile ranges [IQR]) for continuous variables as appropriate. To comprehensively analyze potential risk factors for longer LOS and identify important factors, we first developed a conceptual model using DAG. According to the model, baseline covariates were grouped into five blocks: patient demographic characteristics, COPD complications, comorbidities, hospital and environmental factors. Given the overdispersion in distribution of LOS, negative binomial regression was modelled to estimate the effect of potential covariates on hospital stay in each block. Rate ratios (RR,

1  
2  
3 also known as relative risk) with 95% confidence interval (CI) were reported for the  
4 changes in percent of association between covariates and LOS. Then we fitted a final  
5 parsimonious model with significant variables obtained in aforementioned models.  
6  
7 Hospitalization costs among patients with different LOS were compared using Kruskal-  
8 Wallis test. All statistical analyses were performed using SAS 9.4 (SAS Institute Inc., Cary,  
9 North Carolina, USA) with two-tailed  $p < 0.05$ .

10  
11  
12 This study was approved by China-Japan Friendship Hospital Clinical Research  
13 Ethics Committee (approval no. 2018-163-K119). Privacy and confidentiality of all patient's  
14 information were maintained. Patient informed consent was not required.

## 25 RESULTS

26 Altogether, 565 new COPD patients were analyzed (Figure S1). The cohort was mostly  
27 elderly men residing in local areas. The mean $\pm$ SD age was 69 $\pm$ 11 years. Table 1  
28 summarized the general information of eligible patients. Respiratory failure, pulmonary  
29 heart diseases, cardiovascular or cerebrovascular diseases, diabetes and respiratory  
30 infection were the top co-existing morbidities. Most admissions occurred on Monday-  
31 Wednesday. Outpatient departments were the main source for COPD admissions.  
32  
33 Inpatient numbers were similar across seasons. Median exposure to ambient O<sub>3</sub> and  
34 PM<sub>2.5</sub> were 92 ug/m<sup>3</sup> and 52 ug/m<sup>3</sup>, respectively. LOS was 10 (IQR: 8-14) days and total  
35 hospitalization cost was \$2080.7 (1501.6, 2877.17).

### 47 Conceptual model for LOS

48  
49 A conceptual model was developed based on existing knowledge about COPD and its  
50 LOS (Table S1).<sup>17,19,20,29-35</sup> Figure 1 presented the links from individual-level characteristics,  
51 health system-related factors, and environmental factors to LOS.  
52  
53  
54  
55  
56  
57  
58  
59  
60

### Factors associated with LOS

Based on the conceptual model, we grouped potential factors into five blocks: patient demographic characteristics (age, gender, marital status, residence), lung function and COPD complications, comorbidities, hospital factors (emergency admission, weekday) and environmental factors (season, ozone and PM<sub>2.5</sub> at admission).

In single model with each block of factors, concomitant VTE (RR 1.38, 95% CI 1.07-1.76) and pulmonary encephalopathy (RR 1.53, 95% CI 1.06-2.20) were associated with an increased risk of longer stay. Lung function was negatively associated with LOS with marginal insignificance. Respiratory infection (RR 1.12, 95% CI: 1.01-1.24), osteoporosis (RR 1.45, 95% CI: 1.07-1.96), and emergence admission (RR 1.08, 95% CI: 1.01-1.16) emerged as significant risk factors for longer LOS. Regarding demographic and environmental factors, no significant associations were observed (Table 2).

In final parsimonious analysis, concomitant VTE, pulmonary encephalopathy, respiratory infection, and osteoporosis remained significant for increased risk in lengthy stay (all  $P < 0.05$ ) (Table 3).

### COPD economic burden

Patients having prolonged LOS were supposed to consume greater health resources. We further analyzed the changes in COPD healthcare cost over LOS and observed an upward trend in both total hospitalization cost and patients' out-of-pocket cost (both  $P_{\text{trend}} < 0.0001$ ). Figure 2 depicted the increase in costs among patients with LOS  $\leq 8$  days, 9-14 days, and  $> 14$  days divided by quantiles.

### DISCUSSION

COPD is costly and shortening hospital stay is one way to reduce its high economic burden. In this retrospective study involving nearly 600 COPD patients admitted between 2016

1  
2  
3 and 2017, we analyzed factors associated with LOS from multiple aspects, aiming to  
4 identify high-risk population and risk factors that could be utilized to deliver preventive  
5 interventions toward targeted population. COPD complications (VTE, pulmonary  
6 encephalopathy) and comorbidities (respiratory infection and osteoporosis) were identified  
7 as important factors for prolonged LOS. Direct healthcare cost was in a graded increase  
8 with longer LOS.  
9  
10  
11  
12  
13  
14

15 Existing evidence on LOS in COPD patients showed a high heterogeneity and  
16 geographical variation.<sup>17,19,20,36-40</sup> The analysis of COPD audit data across 13 European  
17 countries demonstrated an average LOS of 7 days in COPD patients.<sup>17</sup> In a study of COPD  
18 comorbidity and LOS in US, mean LOS exceeded one week.<sup>40</sup> A real-life study in Norway  
19 showed a much longer LOS among patients admitted to rehabilitation unit, which were  
20 longer than 30 days.<sup>39</sup> In our study, the median LOS was 11 days. Risk factors for longer  
21 LOS also varied across different studies. Such variance are probably due to disparities in  
22 health systems in which patients are managed differently,<sup>17</sup> diverse study population  
23 defined by different in/exclusion criteria, and various ways to deal with data, e.g., outcome  
24 definitions.<sup>19,39</sup> In this study, there was a subgroup of patients who were discharged and  
25 readmitted immediately on the same day for the same cause of hospitalization. To reflect  
26 their real-life experience, we took the same-day discharge and readmission into  
27 consideration.  
28  
29  
30  
31  
32  
33  
34  
35  
36  
37  
38  
39  
40  
41  
42

43 Co-existing morbidities have been mentioned as predictors of LOS.<sup>20,21</sup> As shown  
44 in our data, VTE predicted longer LOS. It can be provoked by immobilization, heightened  
45 systemic inflammation, venous stasis or other factors that place COPD patients at risk of  
46 thrombosis.<sup>40</sup> Patients presenting lower limb swelling, dyspnea or other symptoms usually  
47 undergo ultrasound or CT pulmonary angiogram for diagnosis. The additional  
48 examinations and antithrombotic therapy can prolong their LOS. Likewise, pulmonary  
49 encephalopathy may contribute to the prolonged stay. It occurs when neuronal damage is  
50  
51  
52  
53  
54  
55  
56  
57

1  
2  
3 induced by oxygen and CO<sub>2</sub> retention and acidosis<sup>41</sup>, resulting in physical impairment and  
4 coma, subsequently prolonging hospital stay. Respiratory infections are a common trigger  
5 for COPD exacerbation. In our study, it was significantly associated with LOS. The greater  
6 bacterial load and inflammation could delay patients' recovery, which, in return, placed  
7 patients at greater likelihood of lengthy stay. In an AECOPD study on infectious  
8 phenotypes,<sup>14</sup> COPD patients with virus and/or bacteria infection had longer LOS than  
9 non-infectious patients. Besides, osteoporosis emerged as another contributor to lengthy  
10 stay. In GOLD 2020, osteoporosis is mentioned as a concomitant chronic disease that  
11 influences COPD patients' hospitalizations.<sup>42</sup> Some factors specific to COPD precipitate  
12 osteoporosis development, e.g., long-term inhaled corticosteroids use for maintenance  
13 therapy<sup>40,43,44</sup>, and lung function deterioration in disease progress.<sup>45</sup> Systematic  
14 inflammation and oxidative stress through sarcopenia in COPD can lead to bone metabolic  
15 abnormalities and COPD-associated osteoporosis<sup>45</sup>, placing COPD patients at an  
16 increased risk of fractures and longer stay.<sup>46</sup> The prolonged LOS in patients with  
17 aforementioned concomitant diseases underscore the need for effective management of  
18 COPD comorbidities and early prevention.

19  
20  
21  
22  
23  
24  
25  
26  
27  
28  
29  
30  
31  
32  
33  
34  
35  
36  
37 Additionally, we observed a monotonically increasing trend in both total  
38 hospitalization cost and out-of-pocket cost over LOS, indicating longer hospital stay cost  
39 more in COPD patients. The domestic and international studies concordantly showed that  
40 COPD is a highly expensive disease and hospital-based care cost represents the major  
41 cost driver.<sup>7,12</sup> The proportion varies across regions in China, ranging from 65.9% to  
42 77%.<sup>6,7</sup> In 2016, COPD hospitalization cost was \$3669.33 per patient per admission.<sup>10</sup> In  
43 US, hospitalization is responsible for over 70% of total COPD healthcare costs.<sup>19</sup> The  
44 direct cost is estimated at \$72 billion annually<sup>11</sup> and is projected to be on the rise,<sup>11,12</sup>  
45 imposing substantial economic burden on society and individuals. The issue may be  
46 addressed through shortening hospital stay with tailored interventions taken.



1  
2  
3  
4  
5  
6  
7  
8  
9  
10  
11  
12  
13  
14  
15  
16  
17  
18  
19  
20  
21  
22  
23  
24  
25  
26  
27  
28  
29  
30  
31  
32  
33  
34  
35  
36  
37  
38  
39  
40  
41  
42

There were several strengths in our study. First, we provided clinical epidemiological data on LOS and its risk factors in newly admitted patients for COPD. Currently, studies on hospital stay are mainly restricted to developed countries.<sup>14,17-20,22,36,47,48</sup> Our study demonstrated health care for Chinese COPD patients, including a comprehensive risk factor analysis for LOS and an increase of economic burden along with longer stay. Our study, together with the few prior studies in Chinese people,<sup>14,18</sup> would help fill the gap in knowledge of COPD inpatients' LOS in developing countries. Second, we took the same-day discharge and readmission into consideration when analyzing the collected routinely data in daily clinical practice, which reflected real experiences of hospitalized patients in the real-world clinical setting. The identified risk factors could help determine early interventions to prevent excessive stay, which further reduce economic burden accrued over hospital stay. Hence, the findings are clinically relevant and have clinical implications. In addition, as the analyzed data were from electronic medical records, data collection process was standardized and all data were under scrutiny before entering into electronic system in hospital. Diagnoses of COPD and other diseases were ascertained by reviewing medical records to ensure reliable data. Fourth, the primary data analysis was based on conceptual model by the use of DAG; the findings were theoretical model driven and the visually represented models in DAG made the assumptions about effects of exposures on LOS transparent and explicit.<sup>49</sup>

43  
44  
45  
46  
47  
48  
49  
50  
51  
52  
53  
54  
55  
56  
57

Hospital stay is a complex issue that is subject to patient, hospital and health system factors. The underlying mechanisms have not been completely disentangled. It merits further investigations to figure out one way to prevent prolonged LOS. The monotonically increasing hospitalization cost with LOS underscores the great importance of shortening hospital stay in reducing COPD economic burden, which may keep rising with the growing and aging population.

1  
2  
3 There were several limitations. First, the study was performed in NCRCD, one of  
4 top hospitals in respiratory field in China. LOS may differ in patients admitted to other  
5 health institutes that provide suboptimal care for respiratory disease. To obtain a more  
6 comprehensive profile of hospital stay in Chinese COPD patients, a multi-center study  
7 involving hospitals across different grades and regions is needed. Second, as information  
8 about patients' indirect costs were not available, we used hospitalization costs as a proxy  
9 for COPD economic burden. A profound analysis of COPD economic burden should  
10 evaluate indirect costs.  
11  
12  
13  
14  
15  
16  
17  
18  
19  
20  
21

## 22 **CONCLUSION**

23  
24 This study underscores the significance of concomitant morbidities and disease severity  
25 in predicting COPD hospital stay. Healthcare cost increased over hospital stay.  
26 Identification of high-risk patients for excess stay and delivery of early interventions such  
27 as thromboprophylaxis may offer one way to shorten LOS in COPD patients, which would  
28 help reduce the economic burden accrued over the stay.  
29  
30  
31  
32  
33  
34  
35  
36  
37  
38  
39  
40  
41  
42  
43  
44  
45  
46  
47  
48  
49  
50  
51  
52  
53  
54  
55  
56  
57  
58  
59  
60

1  
2  
3 **Acknowledgements** we thank hospital's administrative and finance departments for  
4  
5 their help with data collection.  
6

7  
8 **Author Contributions** T.Y., J.J.J., C.W. were involved in conceptualization, funding  
9  
10 acquisition and supervision. F.D., Y.Y.W., Y.L., X.S.L. collected data. F.D., X.X.R., K.H.  
11  
12 analyzed and interpreted the data. F.D. wrote the draft of manuscript: T.Y., J.J.J., F.D.,  
13  
14 C.W., K.H., X.X.R., S.W.Q, H.T.N., Y.Y.W., Y.L., M.Y.L., X.S.L. contributed to writing-  
15  
16 review and approved the final manuscript.  
17

18  
19 **Funding** This study was supported by National Key R&D Program of China  
20  
21 (2016YFC0206502), National Key R&D Program of China (2016YFC1303900), CAMS  
22  
23 Innovation Fund for Medical Sciences (CIFMS) (2018-I2M-1-001), and Science  
24  
25 Foundation of China-Japan Friendship Hospital for junior researchers (2017-1-QN-3).  
26

27  
28 **Disclaimer** No conflicts of interest are involved in this manuscript.  
29

30  
31 **Competing interests** None declared  
32

33  
34 **Patient consent for publication** Not required  
35

36  
37 **Ethics approval** We obtained approval from the China-Japan Friendship Hospital Clinical  
38  
39 Research Ethics Committee (approval no. 2018-163-K119). Privacy and confidentiality of  
40  
41 all patient's information were maintained. Patient informed consent was not required.  
42

43  
44 **Data sharing statement** No additional data are available  
45

46  
47 **Availability of data and material:** Not applicable  
48

49  
50 **Code availability:** Not applicable  
51  
52  
53  
54  
55  
56  
57

## REFERENCES

1. Zhou M, Wang H, Zeng X, et al. Mortality, morbidity, and risk factors in China and its provinces, 1990-2017: a systematic analysis for the Global Burden of Disease Study 2017. *Lancet (London, England)*. 2019;394(10204):1145-1158.
2. Wang C, Xu J, Yang L, et al. Prevalence and risk factors of chronic obstructive pulmonary disease in China (the China Pulmonary Health [CPH] study): a national cross-sectional study. *Lancet (London, England)*. 2018;391(10131):1706-1717.
3. Viniol C, Vogelmeier CF. Exacerbations of COPD. *European respiratory review : an official journal of the European Respiratory Society*. 2018;27(147).
4. Lareau S, Moseson E, Slatore CG. Exacerbation of COPD. *American journal of respiratory and critical care medicine*. 2018;198(11):P21-p22.
5. Donaldson GC, Wedzicha JA. COPD exacerbations .1: Epidemiology. *Thorax*. 2006;61(2):164-168.
6. Chen X, Wang N, Chen Y, Xiao T, Fu C, Xu B. Costs of chronic obstructive pulmonary disease in urban areas of China: a cross-sectional study in four cities. *International journal of chronic obstructive pulmonary disease*. 2016;11:2625-2632.
7. Zhu B, Wang Y, Ming J, Chen W, Zhang L. Disease burden of COPD in China: a systematic review. *International journal of chronic obstructive pulmonary disease*. 2018;13:1353-1364.
8. Fang X, Wang X, Bai C. COPD in China: the burden and importance of proper management. *Chest*. 2011;139(4):920-929.
9. He QY, Zhou X, Xie CM, Liang ZA, Chen P, Wu CG. [Impact of chronic obstructive pulmonary disease on quality of life and economic burden in Chinese urban areas]. *Zhonghua jie he he hu xi za zhi = Zhonghua jiehe he huxi zazhi = Chinese journal of tuberculosis and respiratory diseases*. 2009;32(4):253-257.

10. Li M, Wang F, Chen R, et al. Factors contributing to hospitalization costs for patients with COPD in China: a retrospective analysis of medical record data. *International journal of chronic obstructive pulmonary disease*. 2018;13:3349-3357.
11. Khakban A, Sin DD, FitzGerald JM, et al. The Projected Epidemic of Chronic Obstructive Pulmonary Disease Hospitalizations over the Next 15 Years. A Population-based Perspective. *American journal of respiratory and critical care medicine*. 2017;195(3):287-291.
12. Guarascio AJ, Ray SM, Finch CK, Self TH. The clinical and economic burden of chronic obstructive pulmonary disease in the USA. *ClinicoEconomics and outcomes research : CEOR*. 2013;5:235-245.
13. Ramsey SD, Hobbs FD. Chronic obstructive pulmonary disease, risk factors, and outcome trials: comparisons with cardiovascular disease. *Proceedings of the American Thoracic Society*. 2006;3(7):635-640.
14. Dai MY, Qiao JP, Xu YH, Fei GH. Respiratory infectious phenotypes in acute exacerbation of COPD: an aid to length of stay and COPD Assessment Test. *International journal of chronic obstructive pulmonary disease*. 2015;10:2257-2263.
15. Chen YH, Yao WZ, Cai BQ, et al. Economic analysis in admitted patients with acute exacerbation of chronic obstructive pulmonary disease. *Chinese medical journal*. 2008;121(7):587-591.
16. Ford ES. Hospital discharges, readmissions, and ED visits for COPD or bronchiectasis among US adults: findings from the nationwide inpatient sample 2001-2012 and Nationwide Emergency Department Sample 2006-2011. *Chest*. 2015;147(4):989-998.
17. Ruparel M, Lopez-Campos JL, Castro-Acosta A, Hartl S, Pozo-Rodriguez F, Roberts CM. Understanding variation in length of hospital stay for COPD exacerbation: European COPD audit. *ERJ open research*. 2016;2(1).

- 1  
2  
3 18. Ko FWS, Chan KP, Ngai J, et al. Blood eosinophil count as a predictor of hospital  
4 length of stay in COPD exacerbations. *Respirology (Carlton, Vic)*. 2020;25(3):259-  
5 266.  
6  
7  
8  
9  
10 19. Wang Y, Stavem K, Dahl FA, Humerfelt S, Haugen T. Factors associated with a  
11 prolonged length of stay after acute exacerbation of chronic obstructive pulmonary  
12 disease (AECOPD). *International journal of chronic obstructive pulmonary disease*.  
13 2014;9:99-105.  
14  
15  
16  
17 20. Harries TH, Thornton HV, Crichton S, Schofield P, Gilkes A, White PT. Length of  
18 stay of COPD hospital admissions between 2006 and 2010: a retrospective  
19 longitudinal study. *International journal of chronic obstructive pulmonary disease*.  
20 2015;10:603-611.  
21  
22  
23  
24  
25 21. Roberts CM, Stone RA, Lowe D, Pursey NA, Buckingham RJ. Co-morbidities and  
26 90-day outcomes in hospitalized COPD exacerbations. *Copd*. 2011;8(5):354-361.  
27  
28  
29  
30  
31 22. Limsuwat C, Mankongpaisarnrung C, Dumrongmongcolgul N, Nugent K. Factors  
32 influencing the length of hospital stay in patients with acute exacerbations of chronic  
33 obstructive pulmonary disease admitted to intensive care units. *Quality*  
34 *management in health care*. 2014;23(2):86-93.  
35  
36  
37  
38  
39 23. National Bureau of Statistics. Available from:  
40 [http://www.stats.gov.cn/tjsj/zxfb/201802/t20180228\\_1585631.html](http://www.stats.gov.cn/tjsj/zxfb/201802/t20180228_1585631.html). Accessed  
41 December 1, 2019.  
42  
43  
44  
45 24. Sethi S. Infection as a comorbidity of COPD. *The European respiratory journal*.  
46 2010;35(6):1209-1215.  
47  
48  
49  
50 25. Celli BR, Decramer M, Wedzicha JA, et al. An official American Thoracic  
51 Society/European Respiratory Society statement: research questions in COPD.  
52 *European respiratory review : an official journal of the European Respiratory*  
53 *Society*. 2015;24(136):159-172.  
54  
55  
56  
57  
58  
59  
60

- 1  
2  
3 26. Cavailles A, Brinchault-Rabin G, Dixmier A, et al. Comorbidities of COPD. *European*  
4 *respiratory review : an official journal of the European Respiratory Society.*  
5  
6 *2013;22(130):454-475.*  
7  
8  
9 27. Garcia-Olmos L, Alberquilla A, Ayala V, et al. Comorbidity in patients with chronic  
10 obstructive pulmonary disease in family practice: a cross sectional study. *BMC*  
11 *family practice.* 2013;14:11.  
12  
13  
14 28. Guerrero M, Crisafulli E, Liapikou A, et al. Readmission for Acute Exacerbation  
15 within 30 Days of Discharge Is Associated with a Subsequent Progressive Increase  
16 in Mortality Risk in COPD Patients: A Long-Term Observational Study. *PloS one.*  
17 *2016;11(3):e0150737.*  
18  
19  
20 29. Ling SH, van Eeden SF. Particulate matter air pollution exposure: role in the  
21 development and exacerbation of chronic obstructive pulmonary disease.  
22 *International journal of chronic obstructive pulmonary disease.* 2009;4:233-243.  
23  
24  
25 30. Li J, Sun S, Tang R, et al. Major air pollutants and risk of COPD exacerbations: a  
26 systematic review and meta-analysis. *International journal of chronic obstructive*  
27 *pulmonary disease.* 2016;11:3079-3091.  
28  
29  
30 31. Anderson JO, Thundiyil JG, Stolbach A. Clearing the air: a review of the effects of  
31 particulate matter air pollution on human health. *Journal of medical toxicology :*  
32 *official journal of the American College of Medical Toxicology.* 2012;8(2):166-175.  
33  
34  
35 32. Donaldson GC, Wedzicha JA. The causes and consequences of seasonal variation  
36 in COPD exacerbations. *International journal of chronic obstructive pulmonary*  
37 *disease.* 2014;9:1101-1110.  
38  
39  
40 33. Hillas G, Perlikos F, Tsiligianni I, Tzanakis N. Managing comorbidities in COPD.  
41 *International journal of chronic obstructive pulmonary disease.* 2015;10:95-109.  
42  
43  
44 34. Eccles R. An explanation for the seasonality of acute upper respiratory tract viral  
45 infections. *Acta oto-laryngologica.* 2002;122(2):183-191.  
46  
47  
48  
49  
50  
51  
52  
53  
54  
55  
56  
57  
58  
59  
60

- 1  
2  
3 35. Parappil A, Depczynski B, Collett P, Marks GB. Effect of comorbid diabetes on  
4 length of stay and risk of death in patients admitted with acute exacerbations of  
5 COPD. *Respirology (Carlton, Vic)*. 2010;15(6):918-922.  
6  
7  
8  
9 36. Agboado G, Peters J, Donkin L. Factors influencing the length of hospital stay  
10 among patients resident in Blackpool admitted with COPD: a cross-sectional study.  
11 *BMJ open*. 2012;2(5).  
12  
13  
14  
15 37. Holland M, Alkhalil M, Chandromouli S, Janjua A, Babores M. Eosinopenia as a  
16 marker of mortality and length of stay in patients admitted with exacerbations of  
17 chronic obstructive pulmonary disease. *Respirology (Carlton, Vic)*. 2010;15(1):165-  
18 167.  
19  
20  
21  
22  
23 38. Ingadottir AR, Beck AM, Baldwin C, et al. Association of energy and protein intakes  
24 with length of stay, readmission and mortality in hospitalised patients with chronic  
25 obstructive pulmonary disease. *The British journal of nutrition*. 2018;119(5):543-551.  
26  
27  
28  
29 39. Vitacca M, Marino S, Comini L, Fezzardi L, Paneroni M. Bacterial Colonization in  
30 COPD Patients Admitted to a Rehabilitation Respiratory Unit and Impact on Length  
31 of Stay: A Real-Life Study. *Copd*. 2018;15(6):581-587.  
32  
33  
34  
35 40. Inabnit LS, Blanchette C, Ruban C. Comorbidities and length of stay in chronic  
36 obstructive pulmonary disease patients. *Copd*. 2018;15(4):355-360.  
37  
38  
39 41. J Han, F Zeng, S Cheng, Z Gong, Zhou Y. The Role of Neurous Autophagy in  
40 Pulmonary Encephalopathy and Signaling Pathways. *West Indian Medical Journal*.  
41 2015.  
42  
43  
44  
45 42. Global strategy for the diagnosis, management and prevention of chronic  
46 obstructive pulmonary disease 2020 report [EB/OL] (2019-11-05) [Accessed April  
47 12, 2020]. <https://goldcopd.org/gold-reports/>.  
48  
49  
50  
51  
52  
53  
54  
55  
56  
57  
58  
59  
60



- 1  
2  
3 43. Waljee AK, Rogers MA, Lin P, et al. Short term use of oral corticosteroids and  
4 related harms among adults in the United States: population based cohort study.  
5  
6 *BMJ (Clinical research ed)*. 2017;357:j1415.  
7  
8  
9  
10 44. Jorgensen NR, Schwarz P, Holme I, Henriksen BM, Petersen LJ, Backer V. The  
11 prevalence of osteoporosis in patients with chronic obstructive pulmonary disease: a  
12 cross sectional study. *Respiratory medicine*. 2007;101(1):177-185.  
13  
14  
15 45. Okazaki R, Watanabe R, Inoue D. Osteoporosis Associated with Chronic  
16 Obstructive Pulmonary Disease. *J Bone Metab*. 2016;23(3):111-120.  
17  
18  
19 46. Papaioannou A, Adachi JD, Parkinson W, Stephenson G, Bedard M. Lengthy  
20 hospitalization associated with vertebral fractures despite control for comorbid  
21 conditions. *Osteoporos Int*. 2001;12(10):870-874.  
22  
23  
24  
25 47. Rinne ST, Wong ES, Hebert PL, et al. Weekend Discharges and Length of Stay  
26 Among Veterans Admitted for Chronic Obstructive Pulmonary Disease. *Medical*  
27 *care*. 2015;53(9):753-757.  
28  
29  
30  
31 48. Quintana JM, Unzurrunzaga A, Garcia-Gutierrez S, et al. Predictors of Hospital  
32 Length of Stay in Patients with Exacerbations of COPD: A Cohort Study. *Journal of*  
33 *general internal medicine*. 2015;30(6):824-831.  
34  
35  
36  
37  
38 49. Lederer DJ, Bell SC, Branson RD, et al. Control of Confounding and Reporting of  
39 Results in Causal Inference Studies. Guidance for Authors from Editors of  
40 Respiratory, Sleep, and Critical Care Journals. *Annals of the American Thoracic*  
41 *Society*. 2019;16(1):22-28.  
42  
43  
44  
45  
46  
47  
48  
49  
50  
51  
52  
53  
54  
55  
56  
57  
58  
59  
60

**Table 1. Characteristics of patients hospitalized for COPD**

|                                              | Study patients N=565            | Values <sup>a</sup> |
|----------------------------------------------|---------------------------------|---------------------|
| Demographic                                  | Age, years                      | 69±11               |
| characteristics                              | Men                             | 392 (69.4)          |
|                                              | Married                         | 544 (96.3)          |
|                                              | Local resident                  | 361 (63.9)          |
| Lung function and complications <sup>b</sup> | Pre-FEV1                        | 1.16 (0.84, 1.73)   |
|                                              | Respiratory failure             | 63 (11.4)           |
|                                              | Pulmonary heart diseases        | 59 (10.7)           |
|                                              | Hypoxemia                       | 10 (1.8)            |
|                                              | VTE                             | 9 (1.6)             |
|                                              | Pneumothorax                    | 2 (0.4)             |
|                                              | Pulmonary encephalopathy        | 4 (0.7)             |
| Comorbidities <sup>b</sup>                   | Cardio/Cerebrovascular Diseases | 340 (61.7)          |
|                                              | Diabetes                        | 102 (18.5)          |
|                                              | Respiratory infection           | 67 (12.2)           |
|                                              | Bronchiectasis                  | 47 (8.5)            |
|                                              | Reflux esophagitis              | 38 (6.9)            |
|                                              | OSAS                            | 18 (3.3)            |
|                                              | Lung cancer                     | 5 (0.9)             |
|                                              | Anxiety depression              | 12 (2.2)            |
|                                              | Osteoporosis                    | 6 (1.1)             |
| Admission                                    | Obesity                         | 56 (9.9)            |
|                                              | Admitted on Thursday-Sunday     | 252 (44.6)          |
|                                              | Admitted from emergency         | 173 (30.7)          |

| Study patients N=565              |                                       | Values <sup>a</sup>      |
|-----------------------------------|---------------------------------------|--------------------------|
| Seasons at admission              | March-May                             | 164 (29.0)               |
|                                   | June-August                           | 145 (25.7)               |
|                                   | Sep.-Nov.                             | 94 (16.6)                |
|                                   | Dec.-Feb.                             | 162 (28.7)               |
| Air pollution at admission        | O <sub>3</sub> , ug/m <sup>3</sup>    | 92 (63, 150)             |
|                                   | PM <sub>2.5</sub> , ug/m <sup>3</sup> | 52 (25, 88)              |
| Hospital stay and healthcare cost | Length of stay, days                  | 10 (8, 14)               |
|                                   | Direct cost of hospitalization, \$    | 2080.7 (1501.6, 2877.17) |

<sup>a</sup> Data were represented as mean ± SD or median (Interquartile) for continuous variables where appropriate and n (%) for categorical variables.

<sup>b</sup> Fourteen patients' complications and comorbidities were missing due to their unavailable data on secondary diagnoses.

**Table 2. Single model analysis for factors associated with hospital stay at index admission based on DAG**

| <b>Block</b>                    | <b>Variable</b>             | <b>RR 95%CI</b>                 | <b>P value</b>   |
|---------------------------------|-----------------------------|---------------------------------|------------------|
| Demographic characteristics     | Age, per 5 years            | 1.01 (0.998-1.03)               | 0.094            |
|                                 | Male                        | 1.05 (0.97-1.13)                | 0.237            |
|                                 | Married                     | 0.88 (0.74-1.05)                | 0.158            |
|                                 | Local residents             | 1.04 (0.96-1.12)                | 0.334            |
| Lung function and complications | FEV1                        | 0.97 (0.95-1.00)                | 0.055            |
|                                 | Respiratory failure         | 1.05 (0.94-1.18)                | 0.396            |
|                                 | Pulmonary heart diseases    | 1.03 (0.92-1.16)                | 0.624            |
|                                 | Hypoxemia                   | 0.96 (0.74-1.24)                | 0.757            |
|                                 | VTE                         | 1.38 (1.07-1.76)                | 0.012*           |
|                                 | Pneumothorax                | 1.63 (0.98-2.70)                | 0.057            |
|                                 | Pulmonary encephalopathy    | 1.53 (1.06-2.20)                | 0.023*           |
|                                 | COPD                        | Cardio/Cerebrovascular Diseases | 1.05 (0.98-1.13) |
| comorbidities                   | Diabetes                    | 0.98 (0.90-1.07)                | 0.648            |
|                                 | Respiratory infection       | 1.12 (1.01-1.24)                | 0.035*           |
|                                 | Bronchiectasis              | 1.00 (0.88-1.13)                | 0.967            |
|                                 | Reflux esophagitis          | 1.00 (0.88-1.15)                | 0.959            |
|                                 | OSAS                        | 1.17 (0.97-1.42)                | 0.094            |
|                                 | Lung cancer                 | 1.09 (0.77-1.57)                | 0.620            |
|                                 | Anxiety depression          | 0.89 (0.69-1.13)                | 0.324            |
|                                 | Osteoporosis                | 1.45 (1.07-1.96)                | 0.018*           |
| Hospital factors                | Obesity                     | 0.97 (0.86-1.08)                | 0.559            |
|                                 | Admitted on Thursday-Sunday | 1.04 (0.97-1.11)                | 0.319            |

| Block                 | Variable                        | RR 95%CI          | P value |
|-----------------------|---------------------------------|-------------------|---------|
|                       | Admitted from emergency         | 1.08 (1.01-1.16)  | 0.033*  |
| Environmental factors | Season at admission, Mar.-May   | 1.01 (0.91-1.12)  | 0.850   |
|                       | Season at admission, Jun.-Aug.  | 1.08 (0.96-1.22)  | 0.176   |
|                       | Season at admission, Sep.-Nov.  | 0.98 (0.88-1.09)  | 0.752   |
|                       | O3, per 10 ug/m <sup>3</sup>    | 1.00 (0.995-1.01) | 0.573   |
|                       | PM2.5, per 10 ug/m <sup>3</sup> | 1.00 (0.998-1.01) | 0.217   |

<sup>a</sup>  $P < 0.05$

**Table 3. Parsimonious analysis for factors associated with hospital stay at index admission**

| Variable                 | RR 95%CI          | P value |
|--------------------------|-------------------|---------|
| Age, per 5 years         | 1.01 (0.997-1.03) | 0.126   |
| Pre-FEV1                 | 0.97 (0.95-1.00)  | 0.055   |
| VTE                      | 1.40 (1.09-1.78)  | 0.007*  |
| Pulmonary encephalopathy | 1.53 (1.07-2.18)  | 0.020*  |
| Respiratory infection    | 1.11 (1.01-1.23)  | 0.040*  |
| Osteoporosis             | 1.42 (1.05-1.91)  | 0.021*  |
| Emergency admission      | 1.06 (0.98-1.14)  | 0.147   |

<sup>a</sup>  $P < 0.05$

1  
2  
3 **Figure 1. Conceptual model using directed acyclic graph (DAG) for factors**  
4  
5 **associated with hospital stay**  
6

7 Based on current knowledge on COPD risk factors, we developed a conceptual model  
8 using DAG. Potential covariates at baseline were grouped into five blocks: patient  
9 demographic characteristics (age, gender, marital status, residence), COPD  
10 complications, comorbidities, hospital factors (emergency admission, weekday of  
11 admission) and environmental factors (season, ozone and PM<sub>2.5</sub> at admission).  
12  
13  
14  
15  
16  
17  
18  
19

20 **Figure 2. COPD costs during hospitalization**  
21

22 During hospitalization, total cost and the out-of-pocket cost were compared among  
23 patients with LOS ≤8 days, 9-14 days, and >14 days according to quartiles of LOS. The  
24 costs increased with longer LOS ( $P_{\text{trend}} < 0.0001$  for both total cost and the out-of-pocket  
25 cost).  
26  
27  
28  
29  
30  
31  
32  
33  
34  
35  
36  
37  
38  
39  
40  
41  
42  
43  
44  
45  
46  
47  
48  
49  
50  
51  
52  
53  
54  
55  
56  
57  
58  
59  
60

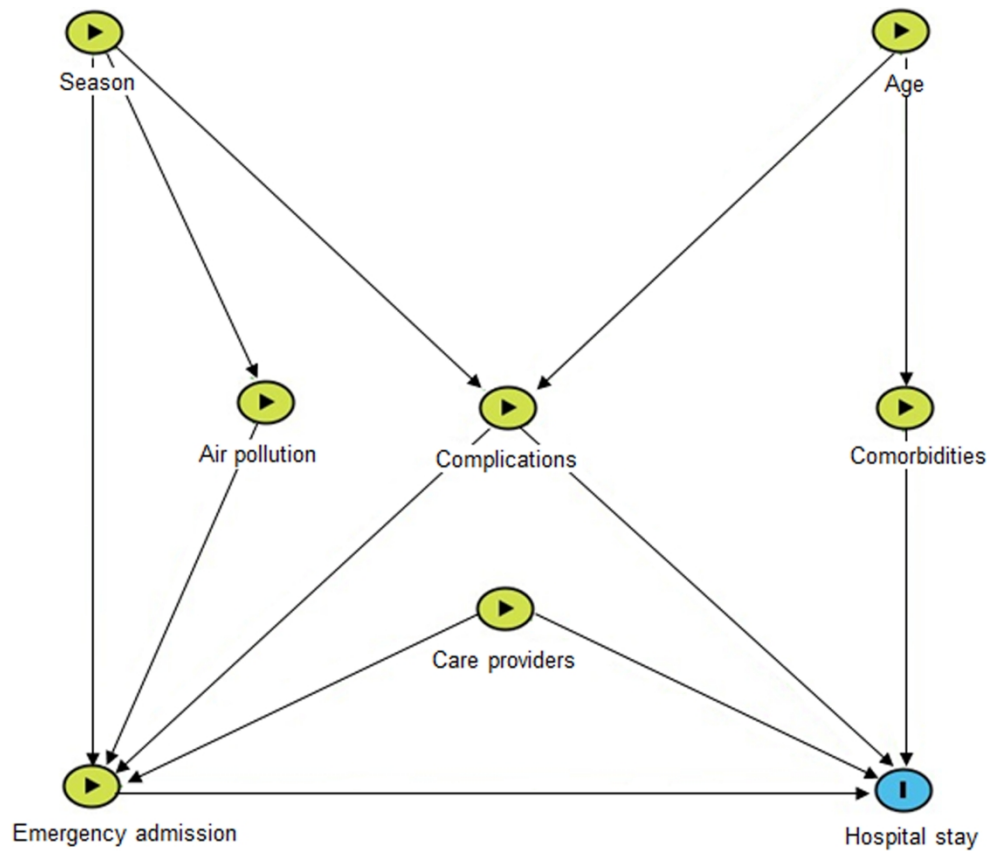

Figure 1. Conceptual model using directed acyclic graph (DAG) for factors associated with hospital stay. Based on current knowledge on COPD risk factors, we developed a conceptual model using DAG. Potential covariates at baseline were grouped into five blocks: patient demographic characteristics (age, gender, marital status, residence), COPD complications, comorbidities, hospital factors (emergency admission, weekday of admission) and environmental factors (season, ozone and PM2.5 at admission).

122x104mm (600 x 600 DPI)



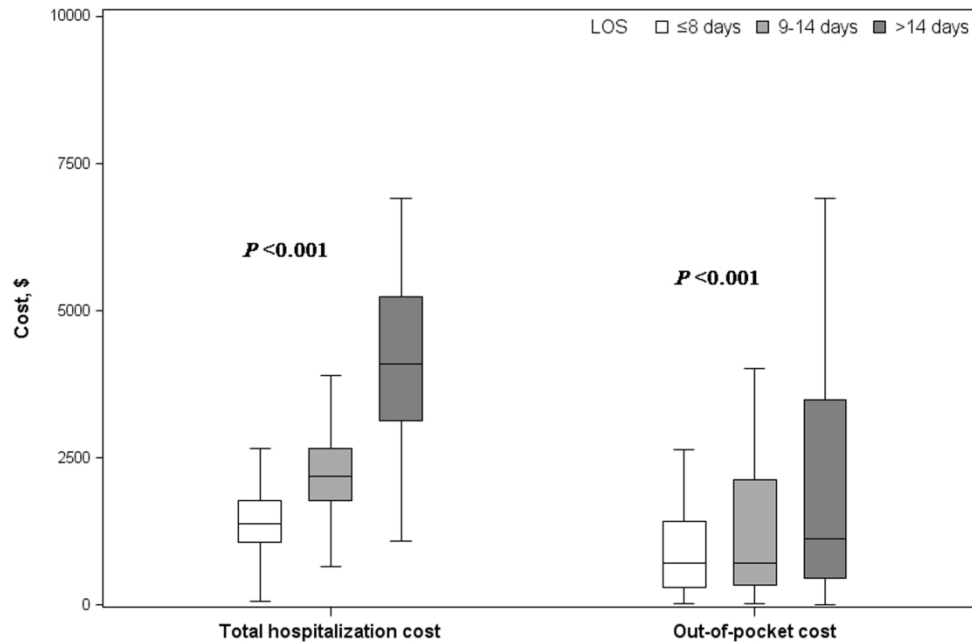

Figure 2. COPD costs during hospitalization

During hospitalization, total cost and the out-of-pocket cost were compared among patients with LOS  $\leq 8$  days, 9-14 days, and  $> 14$  days according to quartiles of LOS. The costs increased with longer LOS (Ptrend  $< 0.0001$  for both total cost and the out-of-pocket cost).

228x152mm (300 x 300 DPI)

## SUPPLEMENTARY INFORMATION

### Factors Associated with Inpatient Length of Stay among Hospitalized Patients with Chronic Obstructive Pulmonary Disease, China, 2016-2017: a retrospective study

Fen Dong<sup>1</sup>, Ke Huang<sup>2</sup>, Xiaoxia Ren<sup>2</sup>, Shiwei Qumu<sup>2</sup>, Hongtao Niu<sup>2</sup>, Yanyan Wang<sup>3</sup>,

Yong Li<sup>2</sup>, Minya Lu<sup>4</sup>, Xinshan Lin<sup>2,5</sup>, Ting Yang<sup>2\*</sup>, Jianjun Jiao<sup>6\*</sup>, Chen Wang<sup>2,7</sup>

**\*Co-corresponding authors:** Ting Yang and Jianjun Jiao contributed equally to this paper as co-corresponding authors.

#### Affiliations:

<sup>1</sup>Institute of Clinical Medical Sciences, China–Japan Friendship Hospital, Beijing, China;

<sup>2</sup>Department of Pulmonary and Critical Care Medicine, China-Japan Friendship Hospital; National Clinical Research Center for Respiratory Diseases; Institute of Respiratory Medicine, Chinese Academy of Medical Science, Beijing, China;

<sup>3</sup>Department of Medical Records, China–Japan Friendship Hospital, Beijing, China;

<sup>4</sup>Department of Clinical Laboratory, Peking Union Medical College Hospital, Chinese Academy of Medical Sciences, Beijing, China;

<sup>5</sup>Graduate School of Peking Union Medical College, Chinese Academy of Medical Sciences & Peking Union Medical College, Beijing, China;

<sup>6</sup>Department of Medical Administration, China–Japan Friendship Hospital, Beijing, China;

<sup>7</sup>Chinese Academy of Medical Sciences & Peking Union Medical College, Beijing, China.

1  
2  
3  
4 **Supplementary** Figure S1- Flow chart of data cleaning process

5 **Supplementary** Table S1- Observational studies on LOS and risk factors in patients  
6 admitted for COPD  
7  
8  
9

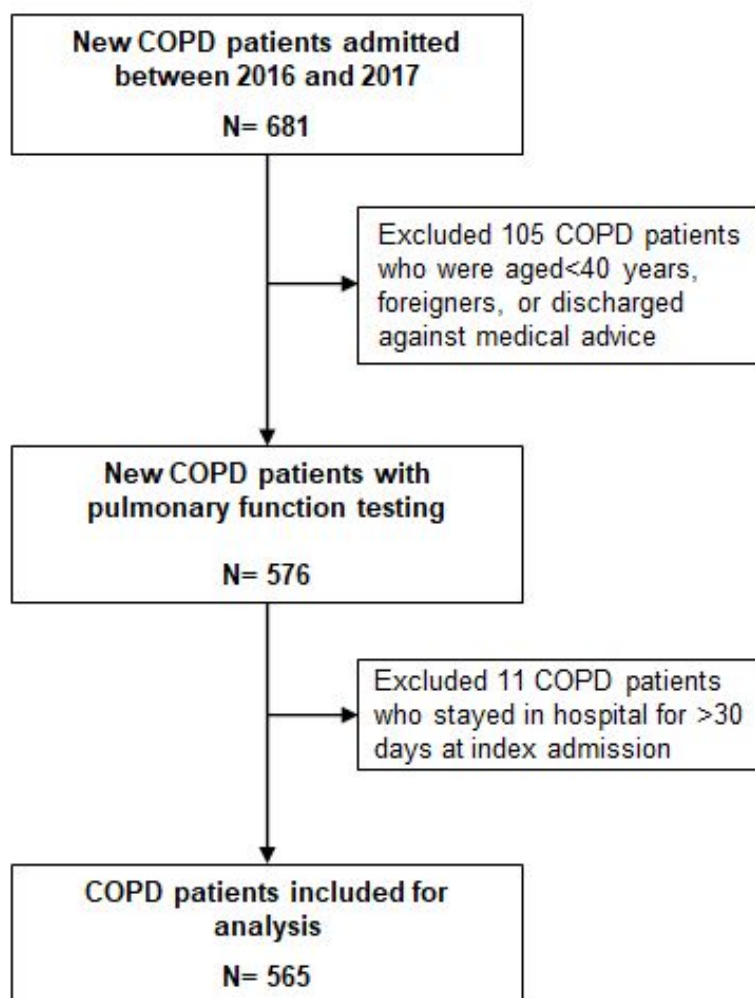

43 **Figure S1- Flow chart of data cleaning process**

**Table S1. Observational studies on LOS and risk factors in patients admitted for COPD <sup>a</sup>**

| Countries/regions                       | Years for LOS                 | Study patients                                                                                            | LOS                                                                | Risk factors for longer LOS                                                                                                                                                           |
|-----------------------------------------|-------------------------------|-----------------------------------------------------------------------------------------------------------|--------------------------------------------------------------------|---------------------------------------------------------------------------------------------------------------------------------------------------------------------------------------|
| Thirteen European counties <sup>1</sup> | Oct.-Dec.2010; Jan.-Feb. 2011 | Exacerbated COPD patients in Europe                                                                       | Median (IQR): 7 (4-11) days                                        | Clinical severity, treatment                                                                                                                                                          |
| UK <sup>2-5</sup>                       | 2006-2010                     | COPD patients registered with London general practitioners aged ≥45 years                                 | Mean: 8.2 days in 2006 and 7 days in 2010                          | Age, hospital and community factors                                                                                                                                                   |
|                                         | Apr.1st, 2005- Mar.31st, 2010 | COPD patients aged ≥40 years in Blackpool, UK                                                             | Median: 6 days<br>Mean: 9.8 days                                   | Age, deprivation, Charlson index, specialty of admission, and cause of exacerbations                                                                                                  |
|                                         | Mar. 2007- Apr. 2008          | 65 AECOPD patients                                                                                        | Median: 5 (1-27) in normal eosinophils and 8 (2-61) in eosinopenia | Eosinopenia                                                                                                                                                                           |
|                                         | Mar. 2015-Mar. 2016           | 99 COPD patients admitted to department of pulmonary medicine at Landspítali National University hospital | 9 days                                                             | No clear association between energy or protein intake and LOS                                                                                                                         |
| Norway <sup>6</sup>                     | March 2006-December 2008      | Patients discharged after COPD at Oslo University hospital in Norway                                      | Median: 6 (3.5-11) days                                            | Admission between Thursday and Saturday, heart failure, diabetes, stroke, high arterial PCO <sub>2</sub> , and low serum albumin level were associated with LOS>11 days. <sup>b</sup> |

| Countries/regions       | Years for LOS                   | Study patients                                                      | LOS                                                                                                   | Risk factors for longer LOS                                                                                                   |
|-------------------------|---------------------------------|---------------------------------------------------------------------|-------------------------------------------------------------------------------------------------------|-------------------------------------------------------------------------------------------------------------------------------|
| Italy <sup>7</sup>      | 2010                            | 269 COPD patients in a respiratory rehabilitation unit in Italy     | Mean ±SD: 31±17 days                                                                                  | Comorbidity, age, invasive procedure, disability, admission provenance predicted longer stay (≥ 30 days) <sup>b</sup>         |
| Portugal <sup>8</sup>   | Jan-Jun., 2016                  | 242 diabetic patients with AECOPD or community acquired pneumonia   | Median: 10 days (min-max, 1-66)                                                                       | LOS was positively correlated with glycemic variability                                                                       |
| Spain <sup>9</sup>      | Jun. 2008-Sep. 2010             | AECOPD patients visiting emergency department in Spain              | -                                                                                                     | Baseline dyspnea, physical activity level, and hospital variability                                                           |
| US <sup>10,11</sup>     | Jan. 1st, -Dec. 31st, 2016      | 3399 COPD patients with LOS ≤60 days in Premier healthcare database | Mean ± SD: 11.64±9.40 days                                                                            | Comorbidity (congestive heart failure, fluid and electrolyte disorders, renal failure) were associated with longer stay       |
|                         | Oct. 1st, 2008- Sep. 30th, 2010 | 25301 COPD patients admitted to veteran affairs health care system  | Mean ± SD: 4.2±2.7 days for weekend discharged patients, 5.4±4.9 days for weekday discharged patients | Fewer weekend discharges was associated with longer stay.                                                                     |
| Australia <sup>12</sup> | 2007                            | 172 AECOPD patients                                                 | 7.8 days in patients with diabetes, 6.5 days in patients without diabetes                             | Patients with diabetes had increased LOS, but differences were not statistically significant after adjustment for covariates. |
| China <sup>13,14</sup>  | Mar. 2013-Aug.2016              | 346 AECOPD patients in a tertiary hospital in Hongkong, China       | Median (IQR): 5 (7) days                                                                              | An eosinophil value of <0.144 × 10 <sup>9</sup> /L on admission or <2% was associated with                                    |

| Countries/regions | Years for LOS      | Study patients                                             | LOS                               | Risk factors for longer LOS                                  |
|-------------------|--------------------|------------------------------------------------------------|-----------------------------------|--------------------------------------------------------------|
|                   |                    |                                                            |                                   | longer hospital LOS ( $\geq 5$ days) for AECOPD <sup>b</sup> |
|                   | January-June, 2014 | 81 exacerbated COPD patients in a hospital in Anhui, China | Mean $\pm$ SD: 9.6 $\pm$ 4.1 days | Respiratory infection was associated with LOS                |

<sup>a</sup> we conducted a literature review by searching literatures in the following database: Medline, Embase, Pubmed and Web of Science. We searched observational studies that focused on risk factors of longer hospital stay at index admission in COPD inpatients. Terms used in search were: "Chronic obstructive pulmonary disease", "COPD", "hospitalization", "length of stay", "LOS", and "hospital stay". Published years ranged from 2000 to 2019. Study types included prospective study, retrospective study, cohort analysis or observational study. We also searched the references in retrieved papers for supplement studies that may be missed during the search

<sup>b</sup> In risk factor analysis, LOS was categorized into a binary variable.<sup>6,7,13</sup>

AECOPD=acute exacerbation of COPD; UK=United Kingdom; US=United States

### References

1. Ruparel M, Lopez-Campos JL, Castro-Acosta A, Hartl S, Pozo-Rodriguez F, Roberts CM. Understanding variation in length of hospital stay for COPD exacerbation: European COPD audit. *ERJ open research*. 2016;2(1).
2. Harries TH, Thornton HV, Crichton S, Schofield P, Gilkes A, White PT. Length of stay of COPD hospital admissions between 2006 and 2010: a retrospective longitudinal study. *International journal of chronic obstructive pulmonary disease*. 2015;10:603-611.

1  
2  
3  
4  
5  
6  
7  
8  
9  
10  
11  
12  
13  
14  
15  
16  
17  
18  
19  
20  
21  
22  
23  
24  
25  
26  
27  
28  
29  
30  
31  
32  
33  
34  
35  
36  
37  
38  
39  
40  
41  
42  
43  
44  
45  
46

3. Agboado G, Peters J, Donkin L. Factors influencing the length of hospital stay among patients resident in Blackpool admitted with COPD: a cross-sectional study. *BMJ open*. 2012;2(5).
4. Holland M, Alkhalil M, Chandromouli S, Janjua A, Babores M. Eosinopenia as a marker of mortality and length of stay in patients admitted with exacerbations of chronic obstructive pulmonary disease. *Respirology (Carlton, Vic)*. 2010;15(1):165-167.
5. Ingadottir AR, Beck AM, Baldwin C, et al. Association of energy and protein intakes with length of stay, readmission and mortality in hospitalised patients with chronic obstructive pulmonary disease. *The British journal of nutrition*. 2018;119(5):543-551.
6. Wang Y, Stavem K, Dahl FA, Humerfelt S, Haugen T. Factors associated with a prolonged length of stay after acute exacerbation of chronic obstructive pulmonary disease (AECOPD). *International journal of chronic obstructive pulmonary disease*. 2014;9:99-105.
7. Vitacca M, Marino S, Comini L, Fezzardi L, Paneroni M. Bacterial Colonization in COPD Patients Admitted to a Rehabilitation Respiratory Unit and Impact on Length of Stay: A Real-Life Study. *Copd*. 2018;15(6):581-587.
8. Ferreira L, Moniz AC, Carneiro AS, et al. The impact of glycemic variability on length of stay and mortality in diabetic patients admitted with community-acquired pneumonia or chronic obstructive pulmonary disease. *Diabetes & metabolic syndrome*. 2019;13(1):149-153.
9. Quintana JM, Unzurrunzaga A, Garcia-Gutierrez S, et al. Predictors of Hospital Length of Stay in Patients with Exacerbations of COPD: A Cohort Study. *Journal of general internal medicine*. 2015;30(6):824-831.
10. Inabnit LS, Blanchette C, Ruban C. Comorbidities and length of stay in chronic obstructive pulmonary disease patients. *Copd*. 2018;15(4):355-360.
11. Rinne ST, Wong ES, Hebert PL, et al. Weekend Discharges and Length of Stay Among Veterans Admitted for Chronic Obstructive Pulmonary Disease. *Medical care*. 2015;53(9):753-757.
12. Parappil A, Depczynski B, Collett P, Marks GB. Effect of comorbid diabetes on length of stay and risk of death in patients admitted with acute exacerbations of COPD. *Respirology (Carlton, Vic)*. 2010;15(6):918-922.
13. Ko FWS, Chan KP, Ngai J, et al. Blood eosinophil count as a predictor of hospital length of stay in COPD exacerbations. *Respirology (Carlton, Vic)*. 2020;25(3):259-266.

- 1  
2  
3  
4  
5 14. Dai MY, Qiao JP, Xu YH, Fei GH. Respiratory infectious phenotypes in acute exacerbation of COPD: an aid to length of stay and COPD  
6 Assessment Test. *International journal of chronic obstructive pulmonary disease*. 2015;10:2257-2263.  
7  
8  
9  
10  
11  
12  
13  
14  
15  
16  
17  
18  
19  
20  
21  
22  
23  
24  
25  
26  
27  
28  
29  
30  
31  
32  
33  
34  
35  
36  
37  
38  
39  
40  
41  
42  
43  
44  
45  
46

For peer review only



# Reporting checklist for cohort study.

Based on the STROBE cohort guidelines.

## Instructions to authors

Complete this checklist by entering the page numbers from your manuscript where readers will find each of the items listed below.

Your article may not currently address all the items on the checklist. Please modify your text to include the missing information. If you are certain that an item does not apply, please write "n/a" and provide a short explanation.

Upload your completed checklist as an extra file when you submit to a journal.

In your methods section, say that you used the STROBE cohort reporting guidelines, and cite them as:

von Elm E, Altman DG, Egger M, Pocock SJ, Gøtzsche PC, Vandenbroucke JP. The Strengthening the Reporting of Observational Studies in Epidemiology (STROBE) Statement: guidelines for reporting observational studies.

|                           | Reporting Item                                                                                         | Page Number |
|---------------------------|--------------------------------------------------------------------------------------------------------|-------------|
| <b>Title and abstract</b> |                                                                                                        |             |
| Title                     | <a href="#">#1a</a> Indicate the study's design with a commonly used term in the title or the abstract | 1           |
| Abstract                  | <a href="#">#1b</a> Provide in the abstract an informative and                                         | 3           |

1 balanced summary of what was done and what  
2  
3 was found  
4

## 5 Introduction

6  
7  
8  
9 Background / [#2](#) Explain the scientific background and rationale 5  
10 rationale for the investigation being reported  
11  
12

13  
14 Objectives [#3](#) State specific objectives, including any 6  
15 prespecified hypotheses  
16  
17

## 18 Methods

19  
20  
21  
22  
23 Study design [#4](#) Present key elements of study design early in 6  
24 the paper  
25  
26

27  
28 Setting [#5](#) Describe the setting, locations, and relevant 6  
29 dates, including periods of recruitment,  
30 exposure, follow-up, and data collection  
31  
32  
33

34  
35  
36 Eligibility criteria [#6a](#) Give the eligibility criteria, and the sources and 6  
37 methods of selection of participants. Describe  
38 methods of follow-up.  
39  
40  
41  
42

43 Eligibility criteria [#6b](#) For matched studies, give matching criteria and n/a  
44 number of exposed and unexposed  
45  
46  
47

48  
49 Variables [#7](#) Clearly define all outcomes, exposures, 7-8  
50 predictors, potential confounders, and effect  
51 modifiers. Give diagnostic criteria, if applicable  
52  
53  
54  
55

56 Data sources / [#8](#) For each variable of interest give sources of 6-8  
57  
58  
59

|    |              |                      |                                                   |                 |
|----|--------------|----------------------|---------------------------------------------------|-----------------|
| 1  | measurement  |                      | data and details of methods of assessment         |                 |
| 2  |              |                      | (measurement). Describe comparability of          |                 |
| 3  |              |                      | assessment methods if there is more than one      |                 |
| 4  |              |                      | group. Give information separately for for        |                 |
| 5  |              |                      | exposed and unexposed groups if applicable.       |                 |
| 6  |              |                      |                                                   |                 |
| 7  |              |                      |                                                   |                 |
| 8  |              |                      |                                                   |                 |
| 9  |              |                      |                                                   |                 |
| 10 |              |                      |                                                   |                 |
| 11 |              |                      |                                                   |                 |
| 12 | Bias         | <a href="#">#9</a>   | Describe any efforts to address potential         | 6               |
| 13 |              |                      | sources of bias                                   |                 |
| 14 |              |                      |                                                   |                 |
| 15 |              |                      |                                                   |                 |
| 16 |              |                      |                                                   |                 |
| 17 |              |                      |                                                   |                 |
| 18 | Study size   | <a href="#">#10</a>  | Explain how the study size was arrived at         | n/a. In this    |
| 19 |              |                      |                                                   | retrospectively |
| 20 |              |                      |                                                   | cohort,         |
| 21 |              |                      |                                                   | patients were   |
| 22 |              |                      |                                                   | consecutively   |
| 23 |              |                      |                                                   | admitted        |
| 24 |              |                      |                                                   |                 |
| 25 |              |                      |                                                   |                 |
| 26 |              |                      |                                                   |                 |
| 27 |              |                      |                                                   |                 |
| 28 |              |                      |                                                   |                 |
| 29 |              |                      |                                                   |                 |
| 30 |              |                      |                                                   |                 |
| 31 |              |                      |                                                   |                 |
| 32 | Quantitative | <a href="#">#11</a>  | Explain how quantitative variables were           | 7-9             |
| 33 | variables    |                      | handled in the analyses. If applicable, describe  |                 |
| 34 |              |                      | which groupings were chosen, and why              |                 |
| 35 |              |                      |                                                   |                 |
| 36 |              |                      |                                                   |                 |
| 37 |              |                      |                                                   |                 |
| 38 |              |                      |                                                   |                 |
| 39 |              |                      |                                                   |                 |
| 40 | Statistical  | <a href="#">#12a</a> | Describe all statistical methods, including those | 8-9             |
| 41 | methods      |                      | used to control for confounding                   |                 |
| 42 |              |                      |                                                   |                 |
| 43 |              |                      |                                                   |                 |
| 44 |              |                      |                                                   |                 |
| 45 | Statistical  | <a href="#">#12b</a> | Describe any methods used to examine              | n/a. In this    |
| 46 | methods      |                      | subgroups and interactions                        | study, we       |
| 47 |              |                      |                                                   | studied         |
| 48 |              |                      |                                                   | potential       |
| 49 |              |                      |                                                   | factors related |
| 50 |              |                      |                                                   | to length of    |
| 51 |              |                      |                                                   |                 |
| 52 |              |                      |                                                   |                 |
| 53 |              |                      |                                                   |                 |
| 54 |              |                      |                                                   |                 |
| 55 |              |                      |                                                   |                 |
| 56 |              |                      |                                                   |                 |
| 57 |              |                      |                                                   |                 |
| 58 |              |                      |                                                   |                 |
| 59 |              |                      |                                                   |                 |
| 60 |              |                      |                                                   |                 |

stay in COPD

patients

Statistical [#12c](#) Explain how missing data were addressed 23 Table 1

methods

Statistical [#12d](#) If applicable, explain how loss to follow-up was

methods addressed

Statistical [#12e](#) Describe any sensitivity analyses

methods

## Results

Participants [#13a](#) Report numbers of individuals at each stage of 9 Figure S1

study—eg numbers potentially eligible, examined for eligibility, confirmed eligible, included in the study, completing follow-up, and analysed. Give information separately for for exposed and unexposed groups if applicable.

Participants [#13b](#) Give reasons for non-participation at each 9 Figure S1

stage

Participants [#13c](#) Consider use of a flow diagram 9 Figure S1

Descriptive data [#14a](#) Give characteristics of study participants (eg 9, 23 Table 1

demographic, clinical, social) and information on exposures and potential confounders. Give information separately for exposed and unexposed groups if applicable.

|    |                  |                      |                                                   |                |
|----|------------------|----------------------|---------------------------------------------------|----------------|
| 1  | Descriptive data | <a href="#">#14b</a> | Indicate number of participants with missing      | 23 Table 1     |
| 2  |                  |                      |                                                   |                |
| 3  |                  |                      | data for each variable of interest                |                |
| 4  |                  |                      |                                                   |                |
| 5  |                  |                      |                                                   |                |
| 6  | Descriptive data | <a href="#">#14c</a> | Summarise follow-up time (eg, average and         | 7, hospital    |
| 7  |                  |                      | total amount)                                     | stay at the    |
| 8  |                  |                      |                                                   | initial        |
| 9  |                  |                      |                                                   | admission      |
| 10 |                  |                      |                                                   | was the        |
| 11 |                  |                      |                                                   | follow-up time |
| 12 |                  |                      |                                                   |                |
| 13 |                  |                      |                                                   |                |
| 14 |                  |                      |                                                   |                |
| 15 |                  |                      |                                                   |                |
| 16 |                  |                      |                                                   |                |
| 17 |                  |                      |                                                   |                |
| 18 |                  |                      |                                                   |                |
| 19 |                  |                      |                                                   |                |
| 20 |                  |                      |                                                   |                |
| 21 | Outcome data     | <a href="#">#15</a>  | Report numbers of outcome events or               | 9, 23 Table 1  |
| 22 |                  |                      | summary measures over time. Give information      |                |
| 23 |                  |                      | separately for exposed and unexposed groups       |                |
| 24 |                  |                      | if applicable.                                    |                |
| 25 |                  |                      |                                                   |                |
| 26 |                  |                      |                                                   |                |
| 27 |                  |                      |                                                   |                |
| 28 |                  |                      |                                                   |                |
| 29 |                  |                      |                                                   |                |
| 30 |                  |                      |                                                   |                |
| 31 | Main results     | <a href="#">#16a</a> | Give unadjusted estimates and, if applicable,     | 10, 24-26      |
| 32 |                  |                      | confounder-adjusted estimates and their           | Table 2-3      |
| 33 |                  |                      | precision (eg, 95% confidence interval). Make     |                |
| 34 |                  |                      | clear which confounders were adjusted for and     |                |
| 35 |                  |                      | why they were included                            |                |
| 36 |                  |                      |                                                   |                |
| 37 |                  |                      |                                                   |                |
| 38 |                  |                      |                                                   |                |
| 39 |                  |                      |                                                   |                |
| 40 |                  |                      |                                                   |                |
| 41 |                  |                      |                                                   |                |
| 42 |                  |                      |                                                   |                |
| 43 | Main results     | <a href="#">#16b</a> | Report category boundaries when continuous        | 10 Figure 2    |
| 44 |                  |                      | variables were categorized                        |                |
| 45 |                  |                      |                                                   |                |
| 46 |                  |                      |                                                   |                |
| 47 |                  |                      |                                                   |                |
| 48 | Main results     | <a href="#">#16c</a> | If relevant, consider translating estimates of    | n/a. Relative  |
| 49 |                  |                      | relative risk into absolute risk for a meaningful | risk was the   |
| 50 |                  |                      | time period                                       | main indicator |
| 51 |                  |                      |                                                   | for length of  |
| 52 |                  |                      |                                                   | stay in this   |
| 53 |                  |                      |                                                   |                |
| 54 |                  |                      |                                                   |                |
| 55 |                  |                      |                                                   |                |
| 56 |                  |                      |                                                   |                |
| 57 |                  |                      |                                                   |                |
| 58 |                  |                      |                                                   |                |
| 59 |                  |                      |                                                   |                |
| 60 |                  |                      |                                                   |                |

|    |                   |                     |                                                     |
|----|-------------------|---------------------|-----------------------------------------------------|
| 1  |                   |                     | paper                                               |
| 2  |                   |                     |                                                     |
| 3  |                   |                     |                                                     |
| 4  | Other analyses    | <a href="#">#17</a> | Report other analyses done—e.g., analyses of        |
| 5  |                   |                     | n/a. This                                           |
| 6  |                   |                     | study focused                                       |
| 7  |                   |                     | on the                                              |
| 8  |                   |                     | potential                                           |
| 9  |                   |                     | factors                                             |
| 10 |                   |                     | associated                                          |
| 11 |                   |                     | with                                                |
| 12 |                   |                     | prolonged                                           |
| 13 |                   |                     | hospital stay                                       |
| 14 |                   |                     | in COPD                                             |
| 15 |                   |                     | patients                                            |
| 16 |                   |                     |                                                     |
| 17 |                   |                     |                                                     |
| 18 |                   |                     |                                                     |
| 19 |                   |                     |                                                     |
| 20 |                   |                     |                                                     |
| 21 |                   |                     |                                                     |
| 22 |                   |                     |                                                     |
| 23 |                   |                     |                                                     |
| 24 |                   |                     |                                                     |
| 25 |                   |                     |                                                     |
| 26 |                   |                     |                                                     |
| 27 |                   |                     |                                                     |
| 28 |                   |                     |                                                     |
| 29 | <b>Discussion</b> |                     |                                                     |
| 30 |                   |                     |                                                     |
| 31 |                   |                     |                                                     |
| 32 | Key results       | <a href="#">#18</a> | Summarise key results with reference to study       |
| 33 |                   |                     | 10-11                                               |
| 34 |                   |                     | objectives                                          |
| 35 |                   |                     |                                                     |
| 36 |                   |                     |                                                     |
| 37 |                   |                     |                                                     |
| 38 | Limitations       | <a href="#">#19</a> | Discuss limitations of the study, taking into       |
| 39 |                   |                     | 14                                                  |
| 40 |                   |                     | account sources of potential bias or                |
| 41 |                   |                     | imprecision. Discuss both direction and             |
| 42 |                   |                     | magnitude of any potential bias.                    |
| 43 |                   |                     |                                                     |
| 44 |                   |                     |                                                     |
| 45 |                   |                     |                                                     |
| 46 |                   |                     |                                                     |
| 47 |                   |                     |                                                     |
| 48 | Interpretation    | <a href="#">#20</a> | Give a cautious overall interpretation              |
| 49 |                   |                     | 14                                                  |
| 50 |                   |                     | considering objectives, limitations, multiplicity   |
| 51 |                   |                     | of analyses, results from similar studies, and      |
| 52 |                   |                     | other relevant evidence.                            |
| 53 |                   |                     |                                                     |
| 54 |                   |                     |                                                     |
| 55 |                   |                     |                                                     |
| 56 |                   |                     |                                                     |
| 57 |                   |                     |                                                     |
| 58 | Generalisability  | <a href="#">#21</a> | Discuss the generalisability (external validity) of |
| 59 |                   |                     | 14                                                  |
| 60 |                   |                     |                                                     |

the study results

Other

Information

Funding

[#22](#)

Give the source of funding and the role of the funders for the present study and, if applicable, for the original study on which the present article is based

15

None The STROBE checklist is distributed under the terms of the Creative Commons Attribution License CC-BY. This checklist can be completed online using <https://www.goodreports.org/>, a tool made by the [EQUATOR Network](#) in collaboration with [Penelope.ai](#)

# BMJ Open

## Factors Associated with Inpatient Length of Stay among Hospitalized Patients with Chronic Obstructive Pulmonary Disease, China, 2016-2017: a retrospective study

|                                 |                                                                                                                                                                                                                                                                                                                                                                                                                                                                                                                                                                                                                                                                                                                                                                                                                                                                                                                                                                                                                                                                                                                                                                                                                                                                                                                                                                                                                                                                                                                                                                                                                                                                                                                                                                                                                                                  |
|---------------------------------|--------------------------------------------------------------------------------------------------------------------------------------------------------------------------------------------------------------------------------------------------------------------------------------------------------------------------------------------------------------------------------------------------------------------------------------------------------------------------------------------------------------------------------------------------------------------------------------------------------------------------------------------------------------------------------------------------------------------------------------------------------------------------------------------------------------------------------------------------------------------------------------------------------------------------------------------------------------------------------------------------------------------------------------------------------------------------------------------------------------------------------------------------------------------------------------------------------------------------------------------------------------------------------------------------------------------------------------------------------------------------------------------------------------------------------------------------------------------------------------------------------------------------------------------------------------------------------------------------------------------------------------------------------------------------------------------------------------------------------------------------------------------------------------------------------------------------------------------------|
| Journal:                        | <i>BMJ Open</i>                                                                                                                                                                                                                                                                                                                                                                                                                                                                                                                                                                                                                                                                                                                                                                                                                                                                                                                                                                                                                                                                                                                                                                                                                                                                                                                                                                                                                                                                                                                                                                                                                                                                                                                                                                                                                                  |
| Manuscript ID                   | bmjopen-2020-040560.R1                                                                                                                                                                                                                                                                                                                                                                                                                                                                                                                                                                                                                                                                                                                                                                                                                                                                                                                                                                                                                                                                                                                                                                                                                                                                                                                                                                                                                                                                                                                                                                                                                                                                                                                                                                                                                           |
| Article Type:                   | Original research                                                                                                                                                                                                                                                                                                                                                                                                                                                                                                                                                                                                                                                                                                                                                                                                                                                                                                                                                                                                                                                                                                                                                                                                                                                                                                                                                                                                                                                                                                                                                                                                                                                                                                                                                                                                                                |
| Date Submitted by the Author:   | 10-Dec-2020                                                                                                                                                                                                                                                                                                                                                                                                                                                                                                                                                                                                                                                                                                                                                                                                                                                                                                                                                                                                                                                                                                                                                                                                                                                                                                                                                                                                                                                                                                                                                                                                                                                                                                                                                                                                                                      |
| Complete List of Authors:       | <p>Dong, Fen; Institute of Clinical Medical Sciences, China-Japan Friendship Hospital,</p> <p>Huang, Ke; China-Japan Friendship Hospital, Department of Pulmonary and Critical Care Medicine; National Clinical Research Center for Respiratory Diseases</p> <p>Ren, Xiaoxia; China-Japan Friendship Hospital, Department of Pulmonary and Critical Care Medicine; National Clinical Research Center for Respiratory Diseases</p> <p>Qumu, Shiwei; China-Japan Friendship Hospital, Department of Pulmonary and Critical Care Medicine; National Clinical Research Center for Respiratory Diseases</p> <p>Niu, Hongtao; China-Japan Friendship Hospital, Department of Pulmonary and Critical Care Medicine; National Clinical Research Center for Respiratory Diseases</p> <p>Wang, Yanyan; China-Japan Friendship Hospital, Department of Medical Records</p> <p>Li, Yong; China-Japan Friendship Hospital, Department of Pulmonary and Critical Care Medicine; National Clinical Research Center for Respiratory Diseases</p> <p>Lu, Minya; Peking Union Medical College Hospital, Chinese Academy of Medical Sciences, Department of Clinical Laboratory</p> <p>Lin, Xinshan; China-Japan Friendship Hospital, Department of Pulmonary and Critical Care Medicine; Chinese Academy of Medical Sciences &amp; Peking Union Medical College, Graduate School of Peking Union Medical College</p> <p>Yang, Ting; China-Japan Friendship Hospital, Department of Pulmonary and Critical Care Medicine; National Clinical Research Center for Respiratory Diseases</p> <p>Jiao, Jianjun; China-Japan Friendship Hospital, Department of Medical Administration</p> <p>Wang, Chen; China-Japan Friendship Hospital, Department of Pulmonary and Critical Care Medicine; Chinese Academy of Medical Sciences &amp; Peking Union Medical College</p> |
| <b>Primary Subject Heading</b>: | Respiratory medicine                                                                                                                                                                                                                                                                                                                                                                                                                                                                                                                                                                                                                                                                                                                                                                                                                                                                                                                                                                                                                                                                                                                                                                                                                                                                                                                                                                                                                                                                                                                                                                                                                                                                                                                                                                                                                             |
| Secondary Subject Heading:      | Epidemiology, Respiratory medicine                                                                                                                                                                                                                                                                                                                                                                                                                                                                                                                                                                                                                                                                                                                                                                                                                                                                                                                                                                                                                                                                                                                                                                                                                                                                                                                                                                                                                                                                                                                                                                                                                                                                                                                                                                                                               |
| Keywords:                       | Chronic airways disease < THORACIC MEDICINE, Epidemiology <                                                                                                                                                                                                                                                                                                                                                                                                                                                                                                                                                                                                                                                                                                                                                                                                                                                                                                                                                                                                                                                                                                                                                                                                                                                                                                                                                                                                                                                                                                                                                                                                                                                                                                                                                                                      |



1  
2  
3  
4  
5  
6  
7  
8  
9  
10  
11  
12  
13  
14  
15  
16  
17  
18  
19  
20  
21  
22  
23  
24  
25  
26  
27  
28  
29  
30  
31  
32  
33  
34  
35  
36  
37  
38  
39  
40  
41  
42  
43  
44  
45  
46  
47  
48  
49  
50  
51  
52  
53  
54  
55  
56  
57  
58  
59  
60

|  |                                                                                     |
|--|-------------------------------------------------------------------------------------|
|  | THORACIC MEDICINE, Risk management < HEALTH SERVICES<br>ADMINISTRATION & MANAGEMENT |
|  |                                                                                     |

SCHOLARONE™  
Manuscripts



I, the Submitting Author has the right to grant and does grant on behalf of all authors of the Work (as defined in the below author licence), an exclusive licence and/or a non-exclusive licence for contributions from authors who are: i) UK Crown employees; ii) where BMJ has agreed a CC-BY licence shall apply, and/or iii) in accordance with the terms applicable for US Federal Government officers or employees acting as part of their official duties; on a worldwide, perpetual, irrevocable, royalty-free basis to BMJ Publishing Group Ltd ("BMJ") its licensees and where the relevant Journal is co-owned by BMJ to the co-owners of the Journal, to publish the Work in this journal and any other BMJ products and to exploit all rights, as set out in our [licence](#).

The Submitting Author accepts and understands that any supply made under these terms is made by BMJ to the Submitting Author unless you are acting as an employee on behalf of your employer or a postgraduate student of an affiliated institution which is paying any applicable article publishing charge ("APC") for Open Access articles. Where the Submitting Author wishes to make the Work available on an Open Access basis (and intends to pay the relevant APC), the terms of reuse of such Open Access shall be governed by a Creative Commons licence – details of these licences and which [Creative Commons](#) licence will apply to this Work are set out in our licence referred to above.

Other than as permitted in any relevant BMJ Author's Self Archiving Policies, I confirm this Work has not been accepted for publication elsewhere, is not being considered for publication elsewhere and does not duplicate material already published. I confirm all authors consent to publication of this Work and authorise the granting of this licence.

1  
2  
3 **Factors Associated with Inpatient Length of Stay among**  
4  
5  
6 **Hospitalized Patients with Chronic Obstructive Pulmonary**  
7  
8 **Disease, China, 2016-2017: a retrospective study**  
9

10  
11 Fen Dong<sup>1</sup>, Ke Huang<sup>2</sup>, Xiaoxia Ren<sup>2</sup>, Shiwei Qumu<sup>2</sup>, Hongtao Niu<sup>2</sup>, Yanyan Wang<sup>3</sup>, Yong  
12  
13 Li<sup>2</sup>, Minya Lu<sup>4</sup>, Xinshan Lin<sup>2,5</sup>, Ting Yang<sup>2\*</sup>, Jianjun Jiao<sup>6\*</sup>, Chen Wang<sup>2,7</sup>  
14  
15

16  
17 **\*Co-corresponding authors:** Ting Yang and Jianjun Jiao contributed equally to this  
18  
19 paper as co-corresponding authors.  
20  
21

22  
23 **Affiliations:**  
24

25  
26 <sup>1</sup>Institute of Clinical Medical Sciences, China–Japan Friendship Hospital, Beijing, China;  
27

28 <sup>2</sup>Department of Pulmonary and Critical Care Medicine, China-Japan Friendship Hospital;  
29  
30 National Clinical Research Center for Respiratory Diseases; Institute of Respiratory  
31  
32 Medicine, Chinese Academy of Medical Science, Beijing, China;  
33

34 <sup>3</sup>Department of Medical Records, China–Japan Friendship Hospital, Beijing, China;  
35

36 <sup>4</sup>Department of Clinical Laboratory, Peking Union Medical College Hospital, Chinese  
37  
38 Academy of Medical Sciences, Beijing, China;  
39

40 <sup>5</sup>Graduate School of Peking Union Medical College, Chinese Academy of Medical  
41  
42 Sciences & Peking Union Medical College, Beijing, China;  
43

44 <sup>6</sup>Department of Medical Administration, China–Japan Friendship Hospital, Beijing,  
45  
46 China;  
47

48  
49 <sup>7</sup>Chinese Academy of Medical Sciences & Peking Union Medical College, Beijing, China.  
50  
51

52  
53 **Correspondence:** Ting Yang  
54  
55  
56  
57

1  
2  
3 Department of Pulmonary and Critical Care Medicine, China-Japan Friendship Hospital;  
4  
5 National Clinical Research Center for Respiratory Diseases; Institute of Respiratory  
6  
7 Medicine, Chinese Academy of Medical Science. No 2, East Yinghua Road, Chaoyang  
8  
9 District, Beijing, China  
10

11  
12 Tel : +010 8420 6273

13  
14 Email : dryangting@qq.com  
15

16  
17  
18 **Word count** : 2772, excluding the title page, abstract, tables, acknowledgements,  
19  
20 contributions and references.  
21  
22  
23  
24  
25  
26  
27  
28  
29  
30  
31  
32  
33  
34  
35  
36  
37  
38  
39  
40  
41  
42  
43  
44  
45  
46  
47  
48  
49  
50  
51  
52  
53  
54  
55  
56  
57  
58  
59  
60

## ABSTRACT

**Objectives:** To identify factors associated with length of stay (LOS) in Chronic obstructive pulmonary disease (COPD) hospitalized patients, which may help shorten LOS and reduce economic burden accrued over hospital stay.

**Design:** A retrospective cohort study

**Setting:** This study was performed in a tertiary hospital in China.

**Participants:** COPD patients who were aged  $\geq 40$  years and newly admitted between 2016 and 2017.

**Primary and secondary outcome measures:** LOS at initial admission was the primary outcome and health expenditures were the secondary outcome. To identify factors associated with LOS, we collected information at index hospitalization and constructed a conceptual model using directed acyclic graph. Potential factors were classified into five groups: demographic information, disease severity, comorbidities, hospital admission, and environmental factors. Negative binomial regression model was fitted for each block of factors and a parsimonious analysis was performed.

**Results:** Totally, we analyzed 565 COPD patients. The mean age was  $69 \pm 11$  years old and 69.4% were male. The median LOS was 10 (IQR 8-14) days. LOS was significantly longer in patients with venous thromboembolism (VTE) (16 vs 10 days,  $p=0.0002$ ) or with osteoporosis (15 vs 10 days,  $p=0.0228$ ). VTE (RR 1.38, 95% CI 1.07-1.76), hypoxic-hypercarbic encephalopathy (RR 1.53, 95%CI 1.06-2.20), respiratory infection (RR 1.12, 95%CI 1.01-1.24), osteoporosis (RR 1.45, 95%CI 1.07-1.96), and emergence admission (RR 1.08, 95%CI 1.01-1.16) were associated with longer LOS. In parsimonious analysis, all these factors remained significant except emergency admission, highlighting the important role of concomitant morbidities in patients' hospital stay. Total hospitalization cost and patients' out-of-pocket cost increased monotonically with LOS (both  $p_{\text{trend}} < 0.0001$ ).

1  
2  
3 **Conclusion:** Patients' concomitant morbidities predicted excessive LOS in COPD  
4 patients. Healthcare cost increased over the length of stay. Quality improvement initiatives  
5 may need to identify patients at high risk for lengthy stay and implement early interventions  
6 to reduce COPD economic burden.  
7  
8  
9  
10

11  
12  
13 **Keywords:** Pulmonary disease, Chronic obstructive; Length of Stay; Risk Factors; DAG  
14  
15

## 16 **Article Summary**

### 17 **Strengths and limitations of this study**

- 18 ● LOS and economic burden were analyzed in newly admitted COPD patients in  
19 developing countries.
- 20 ● The primary data analysis was based on conceptual model and theoretical model  
21 driven
- 22 ● Real experiences of hospitalized patients in the real-world clinical setting were  
23 analyzed
- 24 ● Analysis in this single center study may not reflect the comprehensive profile of LOS  
25 in Chinese patients.
- 26 ● Indirect hospitalization costs were not analyzed due to unavailability of data on  
27 patients' indirect costs.  
28  
29  
30  
31  
32  
33  
34  
35  
36  
37  
38  
39  
40  
41  
42  
43  
44  
45  
46  
47  
48  
49  
50  
51  
52  
53  
54  
55  
56  
57  
58  
59  
60

## INTRODUCTION

Chronic obstructive pulmonary disease (COPD) is a burdensome chronic respiratory disease. It's estimated to cause 2.6% Disability-Adjusted Life Years (DALYs) globally and ranked as the third top cause of DALYs in China.<sup>1</sup> The prevalence of COPD in Chinese adults is 8.6%, with approximately 100 million COPD patients.<sup>2</sup> People aged over 40 years are particularly at high risk due to its onset in later life. During COPD progress, acute worsening respiratory symptoms can be easily triggered,<sup>3,4</sup> leading to hospitalizations and increased use of health service.<sup>5</sup> Spending on hospital-based care constitute the major healthcare cost in COPD patients, accounting for 65.9%-77% of medical costs in China.<sup>6,7</sup> The direct medical cost of COPD was estimated at \$1732.24 per patient annually in 2006<sup>8,9</sup> and hospitalization cost per admission increased to \$3669.33 in 2016.<sup>10</sup> COPD is also a costly disease in developed countries. In US, it consumes \$72 billion in direct healthcare cost each year<sup>11</sup> and the tremendous cost is projected to be on the rise.<sup>11,12</sup> Given the large prevalent population and substantial economic burden, interventions targeted to COPD hospitalization are needed. Hospital stay is an important outcome for health care systems<sup>13</sup> and indicates the acute impact of exacerbation on patients.<sup>14</sup> Length of stay (LOS) correlates with hospitalization cost.<sup>15</sup> Shortening LOS might be one way to slow down the escalating healthcare cost.

Owing to disparities in healthcare systems or service use, there exists a high heterogeneity of LOS across countries.<sup>12,16,17</sup> In China, some patients stay longer under certain circumstances, eg, discharged and readmitted on the same day due to complicated conditions, prolonging their actual stay for the same hospitalization. Two prior studies in Chinese COPD patients demonstrated that respiratory coinfection and eosinopenia were associated with longer stay.<sup>14,18</sup> However, these studies focused more on single exposure-outcome relationship between one risk factor and LOS. The lengthy stay is multifactorial and a diversity of factors can contribute to prolonged LOS, such as poor patients' health

1  
2  
3 status, complicated disease conditions, and organization operation et al.<sup>17,19-22</sup> Some of  
4 these factors are related to health system and some are patient-level factors. To effectively  
5 reduce LOS and COPD disease burden, it's of paramount importance to identify important  
6 factors associated with LOS.  
7  
8  
9  
10

11 Thus, we conducted a retrospective longitudinal study to analyze factors  
12 associated with hospital stay. Study population were COPD patients who were newly  
13 admitted to National Clinical Research Center for Respiratory Diseases (NCRCD), a  
14 354-bed, medical and clinical research center in a tertiary hospital in Beijing, China.  
15  
16  
17  
18  
19  
20  
21

## 22 **METHODS**

23  
24 We retrospectively analyzed patients consecutively admitted between Jan.1st 2016 to  
25 Dec.31<sup>st</sup> 2017. The eligible patients were Chinese inpatients with primary diagnosis of  
26 COPD at initial admission in respiratory units, who were aged  $\geq 40$  years and had  
27 pulmonary function testing. Considering the aim to identify patients at high risk of  
28 prolonged hospital stay, patients discharged against medical advice were excluded.  
29 Patients who had been hospitalized for COPD in 2015 were also excluded to remove the  
30 influence of COPD admissions within prior 12 months on the first admission during the  
31 study period.<sup>20</sup> Patients with LOS longer than 30 days at the first admission were excluded  
32 as well.  
33  
34  
35  
36  
37  
38  
39  
40  
41  
42

43 All diagnoses, including primary and five secondary diagnoses, were determined  
44 by International Classification of Diseases, 10th Revision (ICD10) coding system. COPD  
45 was defined as J40-J44 in ICD-10 codes. Unique individuals with primary diagnosis of  
46 COPD at index admission were identified. To guarantee accuracy of ICD10 coding,  
47 diagnoses were ascertained by checking details in medical records.  
48  
49  
50  
51  
52  
53  
54  
55

### 56 **Hospital stays**



LOS was calculated as days by subtracting the admission date from discharge date at the index admission, which was the initial hospital stay. For patients readmitted frequently during study period, their initial hospital stays were included for analyses. If patients were discharged and readmitted on the same day, the readmissions were recorded as the same hospitalization as the initial one. LOS for the same-day discharge and readmission were calculated as the summed days of hospital stay in each consecutive admission.

### **Direct economic burden**

Given the unavailability of data about days off from work due to COPD disabling effect, we only analysed direct health care expenditures during hospitalization. Information on total costs and patients' out-of-pocket costs were obtained and converted to U.S. dollars using annual currency exchange rate in 2017 (1 dollar=6.7518 yuan).<sup>23</sup>

### **Potential factors**

COPD is a complex disease involving airflow obstruction and multisystem diseases.<sup>24</sup> We combined secondary diagnoses to characterize COPD's concomitant diseases, including comorbidities and complications according to guidelines<sup>25</sup> and researches.<sup>24,26-28</sup> Comorbidities were cardio/cerebro-vascular diseases, diabetes, respiratory infection, bronchiectasis, gastroesophageal reflux, obstructive sleep apnea syndrome (OSAS), lung cancer, depression or anxiety, and osteoporosis. Complications included respiratory failure, pulmonary heart diseases, hypoxemia, venous thromboembolism (VTE), pneumothorax and hypoxic-hypercarbic encephalopathy. As particulates in the air can trigger respiratory symptoms and lead to emergency visiting or hospitalization,<sup>29-31</sup> we analyzed ambient air pollutants on admission. Data on daily concentrations of particulate matter with a diameter of <2.5  $\mu\text{m}$  (PM<sub>2.5</sub>) and ozone were obtained from the Environment Monitoring Station nearest to the study site. Air pollutant concentrations change across

1  
2  
3 seasons. Given the potential impact of seasonal changes (temperatures, humidity),<sup>32</sup> we  
4 also took seasons into consideration. Emergency admission and day of week of admission  
5 were analyzed as hospital factors. The weekday of admission was dichotomized into  
6  
7 Thursday-Sunday and Monday-Wednesday.  
8  
9  
10

### 11 12 13 **Patient and public involvement**

14  
15 Patients were not involved in this retrospective study.  
16  
17  
18  
19

### 20 **Statistics**

21  
22 Data were summarized as number (percentage) for categorical variables and mean±SD  
23 or median (interquartile ranges [IQR]) for continuous variables as appropriate. The  
24 Wilcoxon rank sum test was adopted to compare LOS between patients with co-existing  
25 morbidities and those without the morbid condition. To comprehensively analyze important  
26 risk factors for longer LOS, we first developed a conceptual model using directed acyclic  
27 graph (DAG). According to the model, baseline covariates were grouped into five blocks:  
28 patient demographic characteristics, COPD complications, comorbidities, hospital and  
29 environmental factors. Given the overdispersion in distribution of LOS, negative binomial  
30 regression was modelled to estimate the effect of potential covariates on hospital stay in  
31 each block. Rate ratios (RR, also known as relative risk) with 95% confidence interval (CI)  
32 were reported for the changes in percent of association between covariates and LOS.  
33  
34 Then we fitted a final parsimonious model with significant variables obtained in  
35 aforementioned models. Hospitalization costs among patients with different LOS were  
36 compared using Kruskal-Wallis test. All statistical analyses were performed using SAS 9.4  
37 (SAS Institute Inc., Cary, North Carolina, USA) with two-tailed  $p < 0.05$ .  
38  
39  
40  
41  
42  
43  
44  
45  
46  
47  
48  
49  
50  
51  
52  
53  
54  
55  
56  
57  
58  
59  
60

1  
2  
3 This study was approved by China-Japan Friendship Hospital Clinical Research  
4 Ethics Committee (approval no. 2018-163-K119). Privacy and confidentiality of all patient's  
5 information were maintained. Patient informed consent was not required.  
6  
7  
8  
9

## 10 11 **RESULTS**

12  
13 Altogether, 565 new COPD patients were analyzed (Figure S1). The cohort had a mean  
14 age of 69±11 years and 69.4% were male. Table 1 summarized the general information  
15 of eligible patients. Respiratory failure (11.4%) and pulmonary heart diseases (10.7%)  
16 were the top complications of COPD while cardiovascular or cerebrovascular diseases  
17 (61.7%) was the most common comorbidity. Among the index admissions, 252 (44.6%)  
18 admissions occurred on Thursday-Sunday. Outpatient departments were the main  
19 source for COPD admissions, with 30.7% admissions from emergency. Inpatient  
20 numbers were similar across seasons. Median exposure to ambient O<sub>3</sub> and PM<sub>2.5</sub> were  
21 92 ug/m<sup>3</sup> and 52 ug/m<sup>3</sup>, respectively. LOS was 10 (IQR: 8-14) days and total  
22 hospitalization cost was \$2080.7 (1501.6, 2877.17).  
23  
24  
25  
26  
27  
28  
29  
30  
31  
32  
33  
34  
35  
36

### 37 **Conceptual model for LOS**

38  
39 A conceptual model was developed based on existing knowledge about COPD and its  
40 LOS (Table S1).<sup>17,19,20,29-35</sup> Figure 1 presented the links from individual-level characteristics,  
41 health system-related factors, and environmental factors to LOS.  
42  
43  
44  
45  
46  
47

### 48 **Factors associated with LOS**

49  
50 Based on the conceptual model, we grouped potential factors into five blocks: patient  
51 demographic characteristics (age, gender), lung function and COPD complications,  
52 comorbidities, hospital factors (emergency admission, weekday) and environmental  
53 factors (season, ozone and PM<sub>2.5</sub> at admission).  
54  
55  
56  
57  
58  
59  
60

1  
2  
3 In single model with each block of factors, concomitant VTE (RR 1.38, 95% CI  
4 1.07-1.76) and hypoxic-hypercarbic encephalopathy (RR 1.53, 95% CI 1.06-2.20) were  
5 associated with an increased risk of longer stay. Lung function was negatively associated  
6 with LOS with marginal insignificance. Respiratory infection (RR 1.12, 95% CI: 1.01-1.24),  
7 osteoporosis (RR 1.45, 95% CI: 1.07-1.96), and emergence admission (RR 1.08, 95% CI:  
8 1.01-1.16) emerged as significant risk factors for longer LOS. No significant associations  
9 were observed regarding demographic and environmental factors (Table 2).

10  
11  
12 When comparing LOS in COPD patients with co-existing morbidities and those  
13 without the morbid conditions, longer LOS was observed in patients with VTE than those  
14 without VTE (16 vs 10 days,  $p=0.0002$ ). In patients with osteoporosis, LOS was longer  
15 compared to those without osteoporosis (15 vs 10 days,  $p=0.0228$ ).

16  
17  
18 In final parsimonious analysis, concomitant VTE, hypoxic-hypercarbic  
19 encephalopathy, respiratory infection, and osteoporosis remained significant for increased  
20 risk in lengthy stay (all  $P<0.05$ ) (Table 3).

### 21 22 23 24 25 26 27 28 29 30 31 32 33 34 35 **COPD economic burden**

36 Patients having prolonged LOS were supposed to consume greater health resources. We  
37 further analyzed the changes in COPD healthcare cost over LOS and observed an upward  
38 trend in both total hospitalization cost and patients' out-of-pocket cost (both  $P_{\text{trend}} < 0.0001$ ).  
39 Figure 2 depicted the increase in costs among patients with LOS  $\leq 8$  days, 9-14 days, and  
40  $> 14$  days divided by quantiles. Total costs in the three subgroups were \$1385.72 (1066.28,  
41 1781.46), \$2177.73 (1779.58, 2650.42) and \$4104.61 (3124.56, 5233.09), respectively  
42 ( $p < 0.0001$ ). The corresponding figures for patients' out-of-pocket cost were \$701.16  
43 (291.69, 1426.55), \$708.13 (329.97, 2130.87) and \$1124.53 (461.49, 3491.55)  
44 ( $p < 0.0001$ ).

## DISCUSSION

COPD is costly and shortening hospital stay is one way to reduce its high economic burden. In this retrospective study involving nearly 600 COPD patients admitted between 2016 and 2017, we analyzed factors associated with LOS from multiple aspects, aiming to identify risk factors that could characterize high-risk population or determine early interventions that should be promptly delivered. COPD complications (VTE, hypoxic-hypercarbic encephalopathy) and comorbidities (respiratory infection and osteoporosis) were identified as important factors for prolonged LOS. Direct healthcare cost was in a graded increase with longer LOS.

Existing evidence on LOS in COPD patients showed a high heterogeneity and geographical variation.<sup>17,19,20,36-40</sup> The analysis of COPD audit data across 13 European countries demonstrated an average LOS of 7 days in COPD patients.<sup>17</sup> In a study of COPD comorbidity and LOS in US, mean LOS exceeded one week.<sup>40</sup> A real-life study in Norway showed a much longer LOS among patients admitted to rehabilitation unit, which were longer than 30 days.<sup>39</sup> In our study, the median LOS was 11 days. Risk factors for longer LOS also varied across different studies. Such variance are probably due to disparities in health systems in which patients are managed,<sup>17</sup> diverse study population defined by different in/exclusion criteria, and various ways to deal with data, e.g., outcome definitions.<sup>19,39</sup> In this study, there was a subgroup of patients who were discharged and readmitted immediately on the same day for the same cause of hospitalization. To reflect their real-life experience, we took the same-day discharge and readmission into consideration.

Co-existing morbidities have been mentioned as predictors of LOS.<sup>20,21</sup> As shown in our data, VTE predicted longer LOS. It can be provoked by immobilization, heightened systemic inflammation, venous stasis or other factors that place COPD patients at risk of thrombosis.<sup>40</sup> Patients presenting lower limb swelling, dyspnea or other symptoms usually

1  
2  
3 undergo ultrasound or CT pulmonary angiogram for diagnosis. The additional  
4 examinations and antithrombotic therapy can prolong their LOS. Likewise, hypoxic-  
5 hypercarbic encephalopathy may contribute to the prolonged stay. It occurs when  
6 neuronal damage is induced by oxygen and CO<sub>2</sub> retention and acidosis<sup>41</sup>, resulting in  
7 physical impairment and coma, subsequently prolonging hospital stay. Respiratory  
8 infections are a common trigger for COPD exacerbation. In our study, it was significantly  
9 associated with LOS. The greater bacterial load and inflammation could delay patients'  
10 recovery, which, in return, placed patients at greater likelihood of lengthy stay. In an  
11 AECOPD study on infectious phenotypes,<sup>14</sup> COPD patients with virus and/or bacteria  
12 infection had longer LOS than non-infectious patients. Osteoporosis was another  
13 contributor to lengthy stay. In GOLD 2020, osteoporosis is mentioned as a concomitant  
14 chronic disease that influences COPD patients' hospitalizations.<sup>42</sup> Some COPD-related  
15 factors precipitate osteoporosis development, e.g., long-term inhaled corticosteroids use  
16 for maintenance therapy<sup>40,43,44</sup>, and lung function deterioration in disease progress.<sup>45</sup>  
17 Systematic inflammation and oxidative stress through sarcopenia in COPD can lead to  
18 bone metabolic abnormalities and COPD-associated osteoporosis<sup>45</sup>, placing COPD  
19 patients at risk of fractures and longer stay.<sup>46</sup> The prolonged LOS in patients with  
20 aforementioned concomitant diseases underscore the need for effective management of  
21 COPD comorbidities and early prevention.

22  
23  
24  
25  
26  
27  
28  
29  
30  
31  
32  
33  
34  
35  
36  
37  
38  
39  
40  
41  
42  
43 Additionally, we observed a monotonically increasing trend in both total  
44 hospitalization cost and out-of-pocket cost over LOS, indicating longer hospital stay cost  
45 more in COPD patients. The domestic and international studies concordantly showed that  
46 COPD is a highly expensive disease and hospital-based care cost represents the major  
47 cost driver.<sup>7,12</sup> In 2016, COPD hospitalization cost was \$3669.33 per Chinese patient per  
48 admission.<sup>10</sup> In US, the cost accounted for over 70% of total COPD healthcare costs.<sup>19</sup>  
49 The direct cost is estimated at \$72 billion annually<sup>11</sup> and is projected to be on the rise.<sup>11,12</sup>

1  
2  
3 The substantial economic burden may be addressed through shortening hospital stay with  
4 tailored interventions taken.  
5

6  
7 As shown in our study, COPD complications, (venous thromboembolism and  
8 hypoxic-hypercarbic encephalopathy) and comorbidities (respiratory infection and  
9 osteoporosis) increased risk of prolonged hospital stay. These comorbid conditions are  
10 potentially preventable and treatable. For instance, early thromboprophylaxis like  
11 anticoagulation or mechanical prophylaxis are adopted when COPD patients are admitted  
12 to prevent thrombotic events during hospitalization; provide respiratory support promptly  
13 when patients present hypoxic-hypercarbic syndrome; and recommend patients  
14 pneumococcal and influenza vaccination to avoid respiratory infection. These tailored  
15 interventions are expected to shorten LOS and save healthcare cost of COPD patients.  
16  
17

18  
19  
20  
21  
22  
23  
24  
25  
26 There were several strengths in our study. First, we provided clinical  
27 epidemiological data on LOS and its risk factors in newly admitted patients for COPD.  
28  
29  
30  
31  
32  
33  
34  
35  
36  
37  
38  
39  
40  
41  
42  
43  
44  
45  
46  
47  
48  
49  
50  
51  
52  
53  
54  
55  
56  
57  
58  
59  
60  
61  
62  
63  
64  
65  
66  
67  
68  
69  
70  
71  
72  
73  
74  
75  
76  
77  
78  
79  
80  
81  
82  
83  
84  
85  
86  
87  
88  
89  
90  
91  
92  
93  
94  
95  
96  
97  
98  
99  
100  
101  
102  
103  
104  
105  
106  
107  
108  
109  
110  
111  
112  
113  
114  
115  
116  
117  
118  
119  
120  
121  
122  
123  
124  
125  
126  
127  
128  
129  
130  
131  
132  
133  
134  
135  
136  
137  
138  
139  
140  
141  
142  
143  
144  
145  
146  
147  
148  
149  
150  
151  
152  
153  
154  
155  
156  
157  
158  
159  
160  
161  
162  
163  
164  
165  
166  
167  
168  
169  
170  
171  
172  
173  
174  
175  
176  
177  
178  
179  
180  
181  
182  
183  
184  
185  
186  
187  
188  
189  
190  
191  
192  
193  
194  
195  
196  
197  
198  
199  
200  
201  
202  
203  
204  
205  
206  
207  
208  
209  
210  
211  
212  
213  
214  
215  
216  
217  
218  
219  
220  
221  
222  
223  
224  
225  
226  
227  
228  
229  
230  
231  
232  
233  
234  
235  
236  
237  
238  
239  
240  
241  
242  
243  
244  
245  
246  
247  
248  
249  
250  
251  
252  
253  
254  
255  
256  
257  
258  
259  
260  
261  
262  
263  
264  
265  
266  
267  
268  
269  
270  
271  
272  
273  
274  
275  
276  
277  
278  
279  
280  
281  
282  
283  
284  
285  
286  
287  
288  
289  
290  
291  
292  
293  
294  
295  
296  
297  
298  
299  
300  
301  
302  
303  
304  
305  
306  
307  
308  
309  
310  
311  
312  
313  
314  
315  
316  
317  
318  
319  
320  
321  
322  
323  
324  
325  
326  
327  
328  
329  
330  
331  
332  
333  
334  
335  
336  
337  
338  
339  
340  
341  
342  
343  
344  
345  
346  
347  
348  
349  
350  
351  
352  
353  
354  
355  
356  
357  
358  
359  
360  
361  
362  
363  
364  
365  
366  
367  
368  
369  
370  
371  
372  
373  
374  
375  
376  
377  
378  
379  
380  
381  
382  
383  
384  
385  
386  
387  
388  
389  
390  
391  
392  
393  
394  
395  
396  
397  
398  
399  
400  
401  
402  
403  
404  
405  
406  
407  
408  
409  
410  
411  
412  
413  
414  
415  
416  
417  
418  
419  
420  
421  
422  
423  
424  
425  
426  
427  
428  
429  
430  
431  
432  
433  
434  
435  
436  
437  
438  
439  
440  
441  
442  
443  
444  
445  
446  
447  
448  
449  
450  
451  
452  
453  
454  
455  
456  
457  
458  
459  
460  
461  
462  
463  
464  
465  
466  
467  
468  
469  
470  
471  
472  
473  
474  
475  
476  
477  
478  
479  
480  
481  
482  
483  
484  
485  
486  
487  
488  
489  
490  
491  
492  
493  
494  
495  
496  
497  
498  
499  
500  
501  
502  
503  
504  
505  
506  
507  
508  
509  
510  
511  
512  
513  
514  
515  
516  
517  
518  
519  
520  
521  
522  
523  
524  
525  
526  
527  
528  
529  
530  
531  
532  
533  
534  
535  
536  
537  
538  
539  
540  
541  
542  
543  
544  
545  
546  
547  
548  
549  
550  
551  
552  
553  
554  
555  
556  
557  
558  
559  
560  
561  
562  
563  
564  
565  
566  
567  
568  
569  
570  
571  
572  
573  
574  
575  
576  
577  
578  
579  
580  
581  
582  
583  
584  
585  
586  
587  
588  
589  
590  
591  
592  
593  
594  
595  
596  
597  
598  
599  
600  
601  
602  
603  
604  
605  
606  
607  
608  
609  
610  
611  
612  
613  
614  
615  
616  
617  
618  
619  
620  
621  
622  
623  
624  
625  
626  
627  
628  
629  
630  
631  
632  
633  
634  
635  
636  
637  
638  
639  
640  
641  
642  
643  
644  
645  
646  
647  
648  
649  
650  
651  
652  
653  
654  
655  
656  
657  
658  
659  
660  
661  
662  
663  
664  
665  
666  
667  
668  
669  
670  
671  
672  
673  
674  
675  
676  
677  
678  
679  
680  
681  
682  
683  
684  
685  
686  
687  
688  
689  
690  
691  
692  
693  
694  
695  
696  
697  
698  
699  
700  
701  
702  
703  
704  
705  
706  
707  
708  
709  
710  
711  
712  
713  
714  
715  
716  
717  
718  
719  
720  
721  
722  
723  
724  
725  
726  
727  
728  
729  
730  
731  
732  
733  
734  
735  
736  
737  
738  
739  
740  
741  
742  
743  
744  
745  
746  
747  
748  
749  
750  
751  
752  
753  
754  
755  
756  
757  
758  
759  
760  
761  
762  
763  
764  
765  
766  
767  
768  
769  
770  
771  
772  
773  
774  
775  
776  
777  
778  
779  
780  
781  
782  
783  
784  
785  
786  
787  
788  
789  
790  
791  
792  
793  
794  
795  
796  
797  
798  
799  
800  
801  
802  
803  
804  
805  
806  
807  
808  
809  
810  
811  
812  
813  
814  
815  
816  
817  
818  
819  
820  
821  
822  
823  
824  
825  
826  
827  
828  
829  
830  
831  
832  
833  
834  
835  
836  
837  
838  
839  
840  
841  
842  
843  
844  
845  
846  
847  
848  
849  
850  
851  
852  
853  
854  
855  
856  
857  
858  
859  
860  
861  
862  
863  
864  
865  
866  
867  
868  
869  
870  
871  
872  
873  
874  
875  
876  
877  
878  
879  
880  
881  
882  
883  
884  
885  
886  
887  
888  
889  
890  
891  
892  
893  
894  
895  
896  
897  
898  
899  
900  
901  
902  
903  
904  
905  
906  
907  
908  
909  
910  
911  
912  
913  
914  
915  
916  
917  
918  
919  
920  
921  
922  
923  
924  
925  
926  
927  
928  
929  
930  
931  
932  
933  
934  
935  
936  
937  
938  
939  
940  
941  
942  
943  
944  
945  
946  
947  
948  
949  
950  
951  
952  
953  
954  
955  
956  
957  
958  
959  
960  
961  
962  
963  
964  
965  
966  
967  
968  
969  
970  
971  
972  
973  
974  
975  
976  
977  
978  
979  
980  
981  
982  
983  
984  
985  
986  
987  
988  
989  
990  
991  
992  
993  
994  
995  
996  
997  
998  
999  
1000

There were several strengths in our study. First, we provided clinical epidemiological data on LOS and its risk factors in newly admitted patients for COPD. Currently, studies on hospital stay are mainly restricted to developed countries.<sup>14,17-20,22,36,47,48</sup> Our study demonstrated health care for Chinese COPD patients, including a comprehensive risk factor analysis for LOS and an increase of economic burden along with longer stay. Our study, together with the few prior studies in Chinese people,<sup>14,18</sup> would help fill the gap in knowledge of COPD inpatients' LOS in developing countries. Second, we took the same-day discharge and readmission into consideration when analyzing the collected routinely data in daily clinical practice, which reflected real experiences of hospitalized patients in the real-world clinical setting. The identified risk factors could help determine early interventions to prevent excessive stay, which further reduce economic burden accrued over hospital stay. Hence, the findings are clinically relevant and have clinical implications. In addition, as the analyzed data were from electronic medical records, data collection process was standardized and all data were under scrutiny before entering into electronic system in hospital. Diagnoses of COPD and

1  
2  
3 other diseases were ascertained by reviewing medical records to ensure reliable data.  
4  
5 Fourth, the primary data analysis was based on conceptual model by the use of DAG,  
6  
7 which visually represented models in a graph with unidirectional arrows and made  
8  
9 assumptions about exposures' effects on LOS transparent and explicit<sup>49</sup>. Thus, the  
10  
11 findings were theoretical model driven.  
12

13  
14 Hospital stay is a complex issue that is subject to patient, hospital and health  
15  
16 system factors. The underlying mechanisms have not been completely disentangled and  
17  
18 merit further investigations. The monotonically increasing hospitalization cost with LOS  
19  
20 underscores the great importance of shortening hospital stay in reducing COPD economic  
21  
22 burden, which may keep rising with the growing and aging population.  
23

24  
25 There were several limitations. First, the study was performed in NCRCD, one  
26  
27 of top hospitals in respiratory field in China. LOS may differ in patients admitted to  
28  
29 secondary hospitals or other health institutes that provide suboptimal care for respiratory  
30  
31 disease. This single-center study may not reflect the overall scenario of COPD  
32  
33 hospitalized patients. We could not analyze the average LOS among patients with  
34  
35 multiple rehospitalizations, which could reflect long-term disease burden of COPD. To  
36  
37 obtain a more comprehensive profile of hospital stay in Chinese COPD patients, it is  
38  
39 necessary to conduct a multi-center study with hospitals across different grades and  
40  
41 regions involved. A nation-wide network of health information system is recommended to  
42  
43 capture all hospitalizations and track the real-time dynamic admissions in COPD  
44  
45 patients. Second, we used hospitalization costs as a proxy for COPD economic burden  
46  
47 because information about patients' indirect costs were not available in this study. To  
48  
49 perform a profound analysis of COPD economic burden, indirect costs also need to be  
50  
51 evaluated. Further study on COPD economic burden should take both direct and indirect  
52  
53 costs into consideration in the future.  
54  
55  
56  
57  
58  
59  
60



## CONCLUSION

This study underscores the significance of concomitant morbidities and disease severity in predicting COPD hospital stay. Healthcare cost increased over hospital stay. Identification of high-risk patients for excess stay and delivery of early interventions such as thromboprophylaxis may offer one way to shorten LOS in COPD patients, which would help reduce the economic burden accrued over the stay.

For peer review only

1  
2  
3 **Acknowledgements** we thank hospital's administrative and finance departments for  
4  
5 their help with data collection.  
6

7  
8 **Author Contributions** T.Y., J.J.J., C.W. were involved in conceptualization, funding  
9  
10 acquisition and supervision. F.D., Y.Y.W., Y.L., X.S.L. collected data. F.D., X.X.R., K.H.  
11  
12 analyzed and interpreted the data. F.D. wrote the draft of manuscript: T.Y., J.J.J., F.D.,  
13  
14 C.W., K.H., X.X.R., S.W.Q, H.T.N., Y.Y.W., Y.L., M.Y.L., X.S.L. contributed to writing-  
15  
16 review and approved the final manuscript.  
17

18  
19 **Funding** This study was supported by National Key R&D Program of China  
20  
21 (2016YFC0206502), National Key R&D Program of China (2016YFC1303900), CAMS  
22  
23 Innovation Fund for Medical Sciences (CIFMS) (2018-I2M-1-001), and Science  
24  
25 Foundation of China-Japan Friendship Hospital for junior researchers (2017-1-QN-3).  
26

27  
28 **Disclaimer** No conflicts of interest are involved in this manuscript.  
29

30  
31 **Competing interests** None declared  
32

33  
34 **Patient consent for publication** Not required  
35

36  
37 **Ethics approval** We obtained approval from the China-Japan Friendship Hospital Clinical  
38  
39 Research Ethics Committee (approval no. 2018-163-K119). Privacy and confidentiality of  
40  
41 all patient's information were maintained. Patient informed consent was not required.  
42

43  
44 **Data sharing statement** No additional data are available  
45

46  
47 **Availability of data and material:** Not applicable  
48

49  
50 **Code availability:** Not applicable  
51  
52  
53  
54  
55  
56  
57

## REFERENCES

1. Zhou M, Wang H, Zeng X, et al. Mortality, morbidity, and risk factors in China and its provinces, 1990-2017: a systematic analysis for the Global Burden of Disease Study 2017. *Lancet (London, England)*. 2019;394(10204):1145-1158.
2. Wang C, Xu J, Yang L, et al. Prevalence and risk factors of chronic obstructive pulmonary disease in China (the China Pulmonary Health [CPH] study): a national cross-sectional study. *Lancet (London, England)*. 2018;391(10131):1706-1717.
3. Viniol C, Vogelmeier CF. Exacerbations of COPD. *European respiratory review : an official journal of the European Respiratory Society*. 2018;27(147).
4. Lareau S, Moseson E, Slatore CG. Exacerbation of COPD. *American journal of respiratory and critical care medicine*. 2018;198(11):P21-p22.
5. Donaldson GC, Wedzicha JA. COPD exacerbations .1: Epidemiology. *Thorax*. 2006;61(2):164-168.
6. Chen X, Wang N, Chen Y, Xiao T, Fu C, Xu B. Costs of chronic obstructive pulmonary disease in urban areas of China: a cross-sectional study in four cities. *International journal of chronic obstructive pulmonary disease*. 2016;11:2625-2632.
7. Zhu B, Wang Y, Ming J, Chen W, Zhang L. Disease burden of COPD in China: a systematic review. *International journal of chronic obstructive pulmonary disease*. 2018;13:1353-1364.
8. Fang X, Wang X, Bai C. COPD in China: the burden and importance of proper management. *Chest*. 2011;139(4):920-929.
9. He QY, Zhou X, Xie CM, Liang ZA, Chen P, Wu CG. [Impact of chronic obstructive pulmonary disease on quality of life and economic burden in Chinese urban areas]. *Zhonghua jie he he hu xi za zhi = Chinese journal of tuberculosis and respiratory diseases*. 2009;32(4):253-257.

- 1  
2  
3 10. Li M, Wang F, Chen R, et al. Factors contributing to hospitalization costs for patients  
4 with COPD in China: a retrospective analysis of medical record data. *International*  
5 *journal of chronic obstructive pulmonary disease*. 2018;13:3349-3357.  
6  
7  
8
- 9 11. Khakban A, Sin DD, FitzGerald JM, et al. The Projected Epidemic of Chronic  
10 Obstructive Pulmonary Disease Hospitalizations over the Next 15 Years. A  
11 Population-based Perspective. *American journal of respiratory and critical care*  
12 *medicine*. 2017;195(3):287-291.  
13  
14  
15
- 16 12. Guarascio AJ, Ray SM, Finch CK, Self TH. The clinical and economic burden of  
17 chronic obstructive pulmonary disease in the USA. *ClinicoEconomics and outcomes*  
18 *research : CEOR*. 2013;5:235-245.  
19  
20  
21
- 22 13. Ramsey SD, Hobbs FD. Chronic obstructive pulmonary disease, risk factors, and  
23 outcome trials: comparisons with cardiovascular disease. *Proceedings of the*  
24 *American Thoracic Society*. 2006;3(7):635-640.  
25  
26  
27
- 28 14. Dai MY, Qiao JP, Xu YH, Fei GH. Respiratory infectious phenotypes in acute  
29 exacerbation of COPD: an aid to length of stay and COPD Assessment Test.  
30 *International journal of chronic obstructive pulmonary disease*. 2015;10:2257-2263.  
31  
32  
33
- 34 15. Chen YH, Yao WZ, Cai BQ, et al. Economic analysis in admitted patients with acute  
35 exacerbation of chronic obstructive pulmonary disease. *Chinese medical journal*.  
36 2008;121(7):587-591.  
37  
38  
39
- 40 16. Ford ES. Hospital discharges, readmissions, and ED visits for COPD or  
41 bronchiectasis among US adults: findings from the nationwide inpatient sample  
42 2001-2012 and Nationwide Emergency Department Sample 2006-2011. *Chest*.  
43 2015;147(4):989-998.  
44  
45  
46
- 47 17. Ruparel M, Lopez-Campos JL, Castro-Acosta A, Hartl S, Pozo-Rodriguez F,  
48 Roberts CM. Understanding variation in length of hospital stay for COPD  
49 exacerbation: European COPD audit. *ERJ open research*. 2016;2(1).  
50  
51  
52

- 1  
2  
3 18. Ko FWS, Chan KP, Ngai J, et al. Blood eosinophil count as a predictor of hospital  
4 length of stay in COPD exacerbations. *Respirology (Carlton, Vic)*. 2020;25(3):259-  
5 266.  
6  
7  
8  
9  
10 19. Wang Y, Stavem K, Dahl FA, Humerfelt S, Haugen T. Factors associated with a  
11 prolonged length of stay after acute exacerbation of chronic obstructive pulmonary  
12 disease (AECOPD). *International journal of chronic obstructive pulmonary disease*.  
13 2014;9:99-105.  
14  
15  
16  
17 20. Harries TH, Thornton HV, Crichton S, Schofield P, Gilkes A, White PT. Length of  
18 stay of COPD hospital admissions between 2006 and 2010: a retrospective  
19 longitudinal study. *International journal of chronic obstructive pulmonary disease*.  
20 2015;10:603-611.  
21  
22  
23  
24  
25 21. Roberts CM, Stone RA, Lowe D, Pursey NA, Buckingham RJ. Co-morbidities and  
26 90-day outcomes in hospitalized COPD exacerbations. *Copd*. 2011;8(5):354-361.  
27  
28  
29  
30 22. Limsuwat C, Mankongpaisarnrung C, Dumrongmongcolgul N, Nugent K. Factors  
31 influencing the length of hospital stay in patients with acute exacerbations of chronic  
32 obstructive pulmonary disease admitted to intensive care units. *Quality*  
33 *management in health care*. 2014;23(2):86-93.  
34  
35  
36  
37  
38 23. National Bureau of Statistics. Available from:  
39 [http://www.stats.gov.cn/tjsj/zxfb/201802/t20180228\\_1585631.html](http://www.stats.gov.cn/tjsj/zxfb/201802/t20180228_1585631.html). Accessed  
40 December 1, 2019.  
41  
42  
43  
44 24. Sethi S. Infection as a comorbidity of COPD. *The European respiratory journal*.  
45 2010;35(6):1209-1215.  
46  
47  
48  
49 25. Celli BR, Decramer M, Wedzicha JA, et al. An official American Thoracic  
50 Society/European Respiratory Society statement: research questions in COPD.  
51 *European respiratory review : an official journal of the European Respiratory*  
52 *Society*. 2015;24(136):159-172.  
53  
54  
55  
56  
57  
58  
59  
60

- 1  
2  
3 26. Cavailles A, Brinchault-Rabin G, Dixmier A, et al. Comorbidities of COPD. *European*  
4 *respiratory review : an official journal of the European Respiratory Society.*  
5  
6 *2013;22(130):454-475.*  
7  
8  
9 27. Garcia-Olmos L, Alberquilla A, Ayala V, et al. Comorbidity in patients with chronic  
10 obstructive pulmonary disease in family practice: a cross sectional study. *BMC*  
11 *family practice.* 2013;14:11.  
12  
13  
14 28. Guerrero M, Crisafulli E, Liapikou A, et al. Readmission for Acute Exacerbation  
15 within 30 Days of Discharge Is Associated with a Subsequent Progressive Increase  
16 in Mortality Risk in COPD Patients: A Long-Term Observational Study. *PloS one.*  
17 *2016;11(3):e0150737.*  
18  
19  
20 29. Ling SH, van Eeden SF. Particulate matter air pollution exposure: role in the  
21 development and exacerbation of chronic obstructive pulmonary disease.  
22 *International journal of chronic obstructive pulmonary disease.* 2009;4:233-243.  
23  
24  
25 30. Li J, Sun S, Tang R, et al. Major air pollutants and risk of COPD exacerbations: a  
26 systematic review and meta-analysis. *International journal of chronic obstructive*  
27 *pulmonary disease.* 2016;11:3079-3091.  
28  
29  
30 31. Anderson JO, Thundiyil JG, Stolbach A. Clearing the air: a review of the effects of  
31 particulate matter air pollution on human health. *Journal of medical toxicology :*  
32 *official journal of the American College of Medical Toxicology.* 2012;8(2):166-175.  
33  
34  
35 32. Donaldson GC, Wedzicha JA. The causes and consequences of seasonal variation  
36 in COPD exacerbations. *International journal of chronic obstructive pulmonary*  
37 *disease.* 2014;9:1101-1110.  
38  
39  
40 33. Hillas G, Perlikos F, Tsiligianni I, Tzanakis N. Managing comorbidities in COPD.  
41 *International journal of chronic obstructive pulmonary disease.* 2015;10:95-109.  
42  
43  
44 34. Eccles R. An explanation for the seasonality of acute upper respiratory tract viral  
45 infections. *Acta oto-laryngologica.* 2002;122(2):183-191.  
46  
47  
48  
49  
50  
51  
52  
53  
54  
55  
56  
57  
58  
59  
60

- 1  
2  
3 35. Parappil A, Depczynski B, Collett P, Marks GB. Effect of comorbid diabetes on  
4 length of stay and risk of death in patients admitted with acute exacerbations of  
5 COPD. *Respirology (Carlton, Vic)*. 2010;15(6):918-922.  
6  
7  
8  
9 36. Agboado G, Peters J, Donkin L. Factors influencing the length of hospital stay  
10 among patients resident in Blackpool admitted with COPD: a cross-sectional study.  
11 *BMJ open*. 2012;2(5).  
12  
13  
14  
15 37. Holland M, Alkhalil M, Chandromouli S, Janjua A, Babores M. Eosinopenia as a  
16 marker of mortality and length of stay in patients admitted with exacerbations of  
17 chronic obstructive pulmonary disease. *Respirology (Carlton, Vic)*. 2010;15(1):165-  
18 167.  
19  
20  
21  
22  
23 38. Ingadottir AR, Beck AM, Baldwin C, et al. Association of energy and protein intakes  
24 with length of stay, readmission and mortality in hospitalised patients with chronic  
25 obstructive pulmonary disease. *The British journal of nutrition*. 2018;119(5):543-551.  
26  
27  
28  
29 39. Vitacca M, Marino S, Comini L, Fezzardi L, Paneroni M. Bacterial Colonization in  
30 COPD Patients Admitted to a Rehabilitation Respiratory Unit and Impact on Length  
31 of Stay: A Real-Life Study. *Copd*. 2018;15(6):581-587.  
32  
33  
34  
35 40. Inabnit LS, Blanchette C, Ruban C. Comorbidities and length of stay in chronic  
36 obstructive pulmonary disease patients. *Copd*. 2018;15(4):355-360.  
37  
38  
39  
40 41. J Han, F Zeng, S Cheng, Z Gong, Zhou Y. The Role of Neurous Autophagy in  
41 Pulmonary Encephalopathy and Signaling Pathways. *West Indian Medical Journal*.  
42 2015.  
43  
44  
45  
46 42. Global strategy for the diagnosis, management and prevention of chronic  
47 obstructive pulmonary disease 2020 report [EB/OL] (2019-11-05) [Accessed April  
48 12, 2020]. <https://goldcopd.org/gold-reports/>.  
49  
50  
51  
52  
53  
54  
55  
56  
57  
58  
59  
60

- 1  
2  
3 43. Waljee AK, Rogers MA, Lin P, et al. Short term use of oral corticosteroids and  
4 related harms among adults in the United States: population based cohort study.  
5  
6 *BMJ (Clinical research ed)*. 2017;357:j1415.  
7  
8  
9  
10 44. Jorgensen NR, Schwarz P, Holme I, Henriksen BM, Petersen LJ, Backer V. The  
11 prevalence of osteoporosis in patients with chronic obstructive pulmonary disease: a  
12 cross sectional study. *Respiratory medicine*. 2007;101(1):177-185.  
13  
14  
15 45. Okazaki R, Watanabe R, Inoue D. Osteoporosis Associated with Chronic  
16 Obstructive Pulmonary Disease. *J Bone Metab*. 2016;23(3):111-120.  
17  
18  
19 46. Papaioannou A, Adachi JD, Parkinson W, Stephenson G, Bedard M. Lengthy  
20 hospitalization associated with vertebral fractures despite control for comorbid  
21 conditions. *Osteoporos Int*. 2001;12(10):870-874.  
22  
23  
24  
25 47. Rinne ST, Wong ES, Hebert PL, et al. Weekend Discharges and Length of Stay  
26 Among Veterans Admitted for Chronic Obstructive Pulmonary Disease. *Medical*  
27 *care*. 2015;53(9):753-757.  
28  
29  
30  
31 48. Quintana JM, Unzurrunzaga A, Garcia-Gutierrez S, et al. Predictors of Hospital  
32 Length of Stay in Patients with Exacerbations of COPD: A Cohort Study. *Journal of*  
33 *general internal medicine*. 2015;30(6):824-831.  
34  
35  
36  
37 49. Lederer DJ, Bell SC, Branson RD, et al. Control of Confounding and Reporting of  
38 Results in Causal Inference Studies. Guidance for Authors from Editors of  
39 Respiratory, Sleep, and Critical Care Journals. *Annals of the American Thoracic*  
40 *Society*. 2019;16(1):22-28.  
41  
42  
43  
44  
45  
46  
47  
48  
49  
50  
51  
52  
53  
54  
55  
56  
57  
58  
59  
60



**Table 1. Characteristics of patients hospitalized for COPD**

|                                              | <b>Study patients N=565</b>        | <b>Values <sup>a</sup></b> |
|----------------------------------------------|------------------------------------|----------------------------|
| Demographic                                  | Age, years                         | 69±11                      |
| characteristics                              | Men                                | 392 (69.4)                 |
|                                              | Married                            | 544 (96.3)                 |
|                                              | Local resident                     | 361 (63.9)                 |
| Lung function and complications <sup>b</sup> | Pre-FEV1                           | 1.16 (0.84, 1.73)          |
|                                              | Respiratory failure                | 63 (11.4)                  |
|                                              | Pulmonary heart diseases           | 59 (10.7)                  |
|                                              | Hypoxemia                          | 10 (1.8)                   |
|                                              | VTE                                | 9 (1.6)                    |
|                                              | Pneumothorax                       | 2 (0.4)                    |
|                                              | Hypoxic-hypercarbic encephalopathy | 4 (0.7)                    |
| Comorbidities <sup>b</sup>                   | Cardio/Cerebrovascular Diseases    | 340 (61.7)                 |
|                                              | Diabetes                           | 102 (18.5)                 |
|                                              | Respiratory infection              | 67 (12.2)                  |
|                                              | Bronchiectasis                     | 47 (8.5)                   |
|                                              | Reflux esophagitis                 | 38 (6.9)                   |
|                                              | OSAS                               | 18 (3.3)                   |
|                                              | Lung cancer                        | 5 (0.9)                    |
|                                              | Anxiety depression                 | 12 (2.2)                   |
|                                              | Osteoporosis                       | 6 (1.1)                    |
| Admission                                    | Obesity                            | 56 (9.9)                   |
|                                              | Admitted on Thursday-Sunday        | 252 (44.6)                 |
|                                              | Admitted from emergency            | 173 (30.7)                 |

| Study patients N=565              |                                       | Values <sup>a</sup>      |
|-----------------------------------|---------------------------------------|--------------------------|
| Seasons at admission              | March-May                             | 164 (29.0)               |
|                                   | June-August                           | 145 (25.7)               |
|                                   | Sep.-Nov.                             | 94 (16.6)                |
|                                   | Dec.-Feb.                             | 162 (28.7)               |
| Air pollution at admission        | O <sub>3</sub> , ug/m <sup>3</sup>    | 92 (63, 150)             |
|                                   | PM <sub>2.5</sub> , ug/m <sup>3</sup> | 52 (25, 88)              |
| Hospital stay and healthcare cost | Length of stay, days                  | 10 (8, 14)               |
|                                   | Direct cost of hospitalization, \$    | 2080.7 (1501.6, 2877.17) |

<sup>a</sup> Data were represented as mean ± SD or median (Interquartile) for continuous variables where appropriate and n (%) for categorical variables.

<sup>b</sup> Fourteen patients' complications and comorbidities were missing due to their unavailable data on secondary diagnoses.

**Table 2. Single model analysis for factors associated with hospital stay at index admission based on DAG**

| Block                           | Variable                           | RR 95%CI                        | P value          |        |
|---------------------------------|------------------------------------|---------------------------------|------------------|--------|
| Demographic characteristics     | Age, per 5 years                   | 1.02 (1.00-1.03)                | 0.032            |        |
|                                 | Male                               | 1.04 (0.96-1.12)                | 0.312            |        |
| Lung function and complications | FEV1                               | 0.97 (0.95-1.00)                | 0.055            |        |
|                                 | Respiratory failure                | 1.05 (0.94-1.18)                | 0.396            |        |
|                                 | Pulmonary heart diseases           | 1.03 (0.92-1.16)                | 0.624            |        |
|                                 | Hypoxemia                          | 0.96 (0.74-1.24)                | 0.757            |        |
|                                 | VTE                                | 1.38 (1.07-1.76)                | 0.012*           |        |
|                                 | Pneumothorax                       | 1.63 (0.98-2.70)                | 0.057            |        |
|                                 | Hypoxic-hypercarbic encephalopathy | 1.53 (1.06-2.20)                | 0.023*           |        |
|                                 | COPD comorbidities                 | Cardio/Cerebrovascular Diseases | 1.05 (0.98-1.13) | 0.184  |
|                                 |                                    | Diabetes                        | 0.98 (0.90-1.07) | 0.648  |
|                                 |                                    | Respiratory infection           | 1.12 (1.01-1.24) | 0.035* |
| Bronchiectasis                  |                                    | 1.00 (0.88-1.13)                | 0.967            |        |
| Reflux esophagitis              |                                    | 1.00 (0.88-1.15)                | 0.959            |        |
| OSAS                            |                                    | 1.17 (0.97-1.42)                | 0.094            |        |
| Lung cancer                     |                                    | 1.09 (0.77-1.57)                | 0.620            |        |
| Anxiety depression              |                                    | 0.89 (0.69-1.13)                | 0.324            |        |
| Hospital factors                | Osteoporosis                       | 1.45 (1.07-1.96)                | 0.018*           |        |
|                                 | Obesity                            | 0.97 (0.86-1.08)                | 0.559            |        |
|                                 | Admitted on Thursday-Sunday        | 1.04 (0.97-1.11)                | 0.319            |        |
| Environmental factors           | Admitted from emergency            | 1.08 (1.01-1.16)                | 0.033*           |        |
|                                 | Season at admission, Mar.-May      | 1.01 (0.91-1.12)                | 0.850            |        |
|                                 | Season at admission, Jun.-Aug.     | 1.08 (0.96-1.22)                | 0.176            |        |

| Block | Variable                        | RR 95%CI          | P value |
|-------|---------------------------------|-------------------|---------|
|       | Season at admission, Sep.-Nov.  | 0.98 (0.88-1.09)  | 0.752   |
|       | O3, per 10 ug/m <sup>3</sup>    | 1.00 (0.995-1.01) | 0.573   |
|       | PM2.5, per 10 ug/m <sup>3</sup> | 1.00 (0.998-1.01) | 0.217   |

<sup>a</sup>  $P < 0.05$

For peer review only

**Table 3. Parsimonious analysis for factors associated with hospital stay at index admission**

| Variable                           | RR 95%CI          | P value |
|------------------------------------|-------------------|---------|
| Age, per 5 years                   | 1.01 (0.997-1.03) | 0.126   |
| Pre-FEV1                           | 0.97 (0.95-1.00)  | 0.055   |
| VTE                                | 1.40 (1.09-1.78)  | 0.007*  |
| Hypoxic-hypercarbic encephalopathy | 1.53 (1.07-2.18)  | 0.020*  |
| Respiratory infection              | 1.11 (1.01-1.23)  | 0.040*  |
| Osteoporosis                       | 1.42 (1.05-1.91)  | 0.021*  |
| Emergency admission                | 1.06 (0.98-1.14)  | 0.147   |

<sup>a</sup>  $P < 0.05$

1  
2  
3 **Figure 1. Conceptual model using directed acyclic graph (DAG) for factors**  
4 **associated with hospital stay**  
5

6  
7 Based on current knowledge on COPD risk factors, we developed a conceptual model  
8 using DAG. Potential covariates at baseline were grouped into five blocks: patient  
9 demographic characteristics (age, gender), COPD complications, comorbidities, hospital  
10 factors (emergency admission, weekday of admission) and environmental factors  
11 (season, ozone and PM<sub>2.5</sub> at admission).  
12  
13  
14  
15  
16  
17  
18  
19

20 **Figure 2. COPD costs during hospitalization**  
21

22 During hospitalization, total cost and the out-of-pocket cost were compared among  
23 patients with LOS ≤8 days, 9-14 days, and >14 days according to quartiles of LOS. The  
24 costs increased with longer LOS ( $P_{\text{trend}} < 0.0001$  for both total cost and the out-of-pocket  
25 cost).  
26  
27  
28  
29  
30  
31  
32  
33  
34  
35  
36  
37  
38  
39  
40  
41  
42  
43  
44  
45  
46  
47  
48  
49  
50  
51  
52  
53  
54  
55  
56  
57  
58  
59  
60

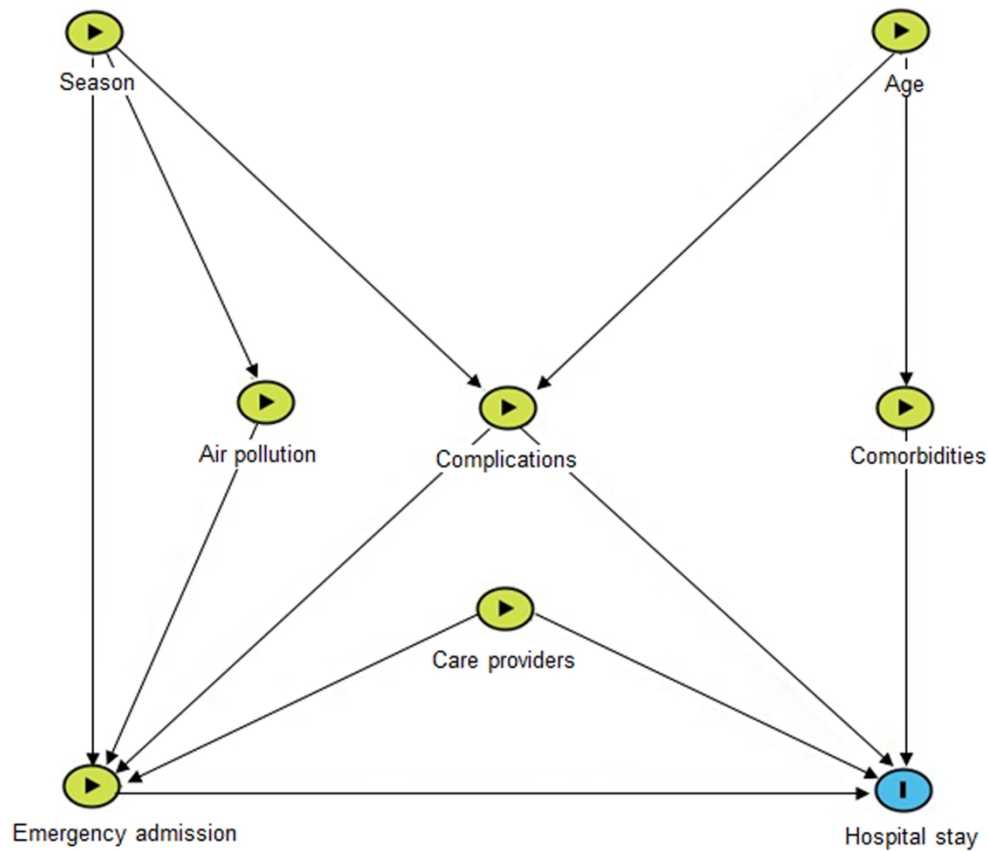

Figure 1. Conceptual model using directed acyclic graph (DAG) for factors associated with hospital stay. Based on current knowledge on COPD risk factors, we developed a conceptual model using DAG. Potential covariates at baseline were grouped into five blocks: patient demographic characteristics (age, gender), COPD complications, comorbidities, hospital factors (emergency admission, weekday of admission) and environmental factors (season, ozone and PM2.5 at admission).

122x104mm (900 x 900 DPI)

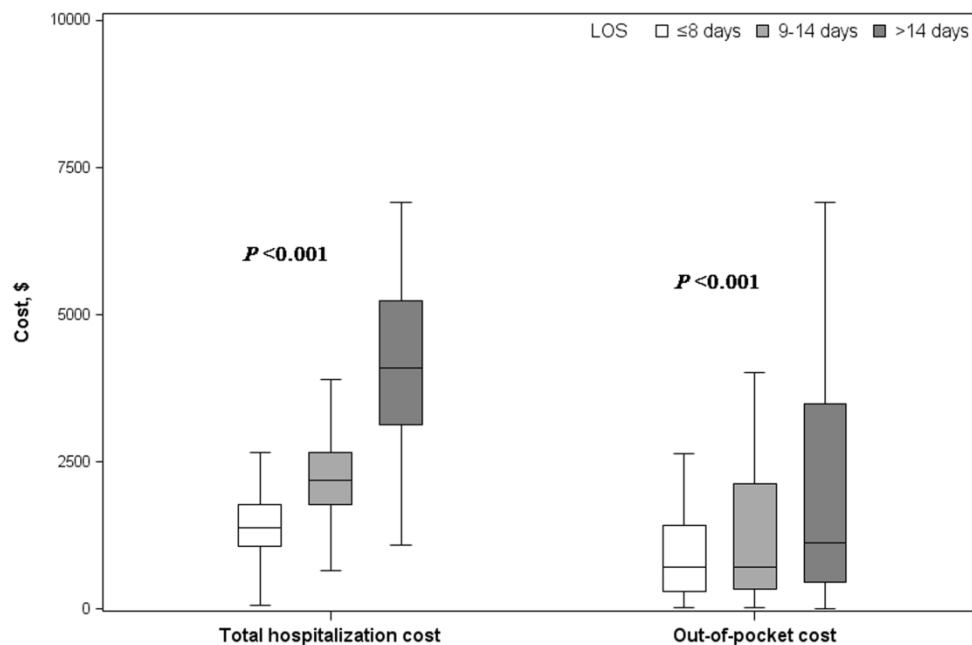

Figure 2. COPD costs during hospitalization  
 During hospitalization, total cost and the out-of-pocket cost were compared among patients with LOS ≤8 days, 9-14 days, and >14 days according to quartiles of LOS. The costs increased with longer LOS (Ptrend <0.0001 for both total cost and the out-of-pocket cost).

228x152mm (300 x 300 DPI)



## SUPPLEMENTARY INFORMATION

### Factors Associated with Inpatient Length of Stay among Hospitalized Patients with Chronic Obstructive Pulmonary Disease, China, 2016-2017: a retrospective study

Fen Dong<sup>1</sup>, Ke Huang<sup>2</sup>, Xiaoxia Ren<sup>2</sup>, Shiwei Qumu<sup>2</sup>, Hongtao Niu<sup>2</sup>, Yanyan Wang<sup>3</sup>,

Yong Li<sup>2</sup>, Minya Lu<sup>4</sup>, Xinshan Lin<sup>2,5</sup>, Ting Yang<sup>2\*</sup>, Jianjun Jiao<sup>6\*</sup>, Chen Wang<sup>2,7</sup>

\***Co-corresponding authors:** Ting Yang and Jianjun Jiao contributed equally to this paper as co-corresponding authors.

#### Affiliations:

<sup>1</sup>Institute of Clinical Medical Sciences, China–Japan Friendship Hospital, Beijing, China;

<sup>2</sup>Department of Pulmonary and Critical Care Medicine, China-Japan Friendship Hospital; National Clinical Research Center for Respiratory Diseases; Institute of Respiratory Medicine, Chinese Academy of Medical Science, Beijing, China;

<sup>3</sup>Department of Medical Records, China–Japan Friendship Hospital, Beijing, China;

<sup>4</sup>Department of Clinical Laboratory, Peking Union Medical College Hospital, Chinese Academy of Medical Sciences, Beijing, China;

<sup>5</sup>Graduate School of Peking Union Medical College, Chinese Academy of Medical Sciences & Peking Union Medical College, Beijing, China;

<sup>6</sup>Department of Medical Administration, China–Japan Friendship Hospital, Beijing, China;

<sup>7</sup>Chinese Academy of Medical Sciences & Peking Union Medical College, Beijing, China.

1  
2  
3  
4 **Supplementary** Figure S1- Flow chart of data cleaning process

5 **Supplementary** Table S1- Observational studies on LOS and risk factors in patients  
6 admitted for COPD  
7  
8  
9

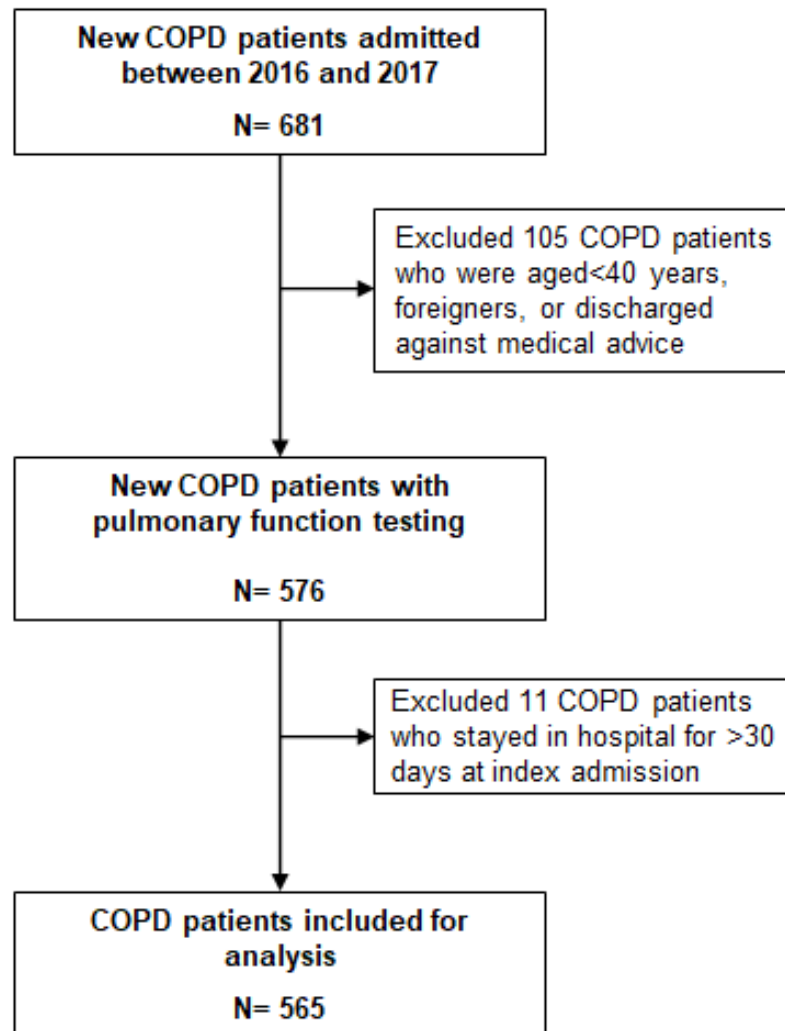

45 **Figure S1- Flow chart of data cleaning process**  
46  
47  
48  
49  
50  
51  
52  
53  
54  
55  
56  
57  
58  
59  
60

**Table S1. Observational studies on LOS and risk factors in patients admitted for COPD <sup>a</sup>**

| Countries/regions                       | Years for LOS                 | Study patients                                                                                            | LOS                                                                | Risk factors for longer LOS                                                                                                                                                           |
|-----------------------------------------|-------------------------------|-----------------------------------------------------------------------------------------------------------|--------------------------------------------------------------------|---------------------------------------------------------------------------------------------------------------------------------------------------------------------------------------|
| Thirteen European counties <sup>1</sup> | Oct.-Dec.2010; Jan.-Feb. 2011 | Exacerbated COPD patients in Europe                                                                       | Median (IQR): 7 (4-11) days                                        | Clinical severity, treatment                                                                                                                                                          |
| UK <sup>2-5</sup>                       | 2006-2010                     | COPD patients registered with London general practitioners aged ≥45 years                                 | Mean: 8.2 days in 2006 and 7 days in 2010                          | Age, hospital and community factors                                                                                                                                                   |
|                                         | Apr.1st, 2005- Mar.31st, 2010 | COPD patients aged ≥40 years in Blackpool, UK                                                             | Median: 6 days<br>Mean: 9.8 days                                   | Age, deprivation, Charlson index, specialty of admission, and cause of exacerbations                                                                                                  |
|                                         | Mar. 2007- Apr. 2008          | 65 AECOPD patients                                                                                        | Median: 5 (1-27) in normal eosinophils and 8 (2-61) in eosinopenia | Eosinopenia                                                                                                                                                                           |
|                                         | Mar. 2015-Mar. 2016           | 99 COPD patients admitted to department of pulmonary medicine at Landspítali National University hospital | 9 days                                                             | No clear association between energy or protein intake and LOS                                                                                                                         |
| Norway <sup>6</sup>                     | March 2006-December 2008      | Patients discharged after COPD at Oslo University hospital in Norway                                      | Median: 6 (3.5-11) days                                            | Admission between Thursday and Saturday, heart failure, diabetes, stroke, high arterial PCO <sub>2</sub> , and low serum albumin level were associated with LOS>11 days. <sup>b</sup> |

| Countries/regions       | Years for LOS                   | Study patients                                                            | LOS                                                                                                                   | Risk factors for longer LOS                                                                                                   |
|-------------------------|---------------------------------|---------------------------------------------------------------------------|-----------------------------------------------------------------------------------------------------------------------|-------------------------------------------------------------------------------------------------------------------------------|
| Italy <sup>7</sup>      | 2010                            | 269 COPD patients in a respiratory rehabilitation unit in Italy           | Mean $\pm$ SD: 31 $\pm$ 17 days                                                                                       | Comorbidity, age, invasive procedure, disability, admission provenance predicted longer stay ( $\geq$ 30 days) <sup>b</sup>   |
| Portugal <sup>8</sup>   | Jan-Jun., 2016                  | 242 diabetic patients with AECOPD or community acquired pneumonia         | Median: 10 days (min-max, 1-66)                                                                                       | LOS was positively correlated with glycemic variability                                                                       |
| Spain <sup>9</sup>      | Jun. 2008-Sep. 2010             | AECOPD patients visiting emergency department in Spain                    | -                                                                                                                     | Baseline dyspnea, physical activity level, and hospital variability                                                           |
| US <sup>10,11</sup>     | Jan. 1st, -Dec. 31st, 2016      | 3399 COPD patients with LOS $\leq$ 60 days in Premier healthcare database | Mean $\pm$ SD: 11.64 $\pm$ 9.40 days                                                                                  | Comorbidity (congestive heart failure, fluid and electrolyte disorders, renal failure) were associated with longer stay       |
|                         | Oct. 1st, 2008- Sep. 30th, 2010 | 25301 COPD patients admitted to veteran affairs health care system        | Mean $\pm$ SD: 4.2 $\pm$ 2.7 days for weekend discharged patients, 5.4 $\pm$ 4.9 days for weekday discharged patients | Fewer weekend discharges was associated with longer stay.                                                                     |
| Australia <sup>12</sup> | 2007                            | 172 AECOPD patients                                                       | 7.8 days in patients with diabetes, 6.5 days in patients without diabetes                                             | Patients with diabetes had increased LOS, but differences were not statistically significant after adjustment for covariates. |
| China <sup>13,14</sup>  | Mar. 2013-Aug.2016              | 346 AECOPD patients in a tertiary hospital in Hongkong, China             | Median (IQR): 5 (7) days                                                                                              | An eosinophil value of $<0.144 \times 10^9/L$ on admission or $<2\%$ was associated with                                      |

| Countries/regions | Years for LOS      | Study patients                                             | LOS                               | Risk factors for longer LOS                                                                                   |
|-------------------|--------------------|------------------------------------------------------------|-----------------------------------|---------------------------------------------------------------------------------------------------------------|
|                   | January-June, 2014 | 81 exacerbated COPD patients in a hospital in Anhui, China | Mean $\pm$ SD: 9.6 $\pm$ 4.1 days | longer hospital LOS ( $\geq$ 5 days) for AECOPD <sup>b</sup><br>Respiratory infection was associated with LOS |

<sup>a</sup> we conducted a literature review by searching literatures in the following database: Medline, Embase, Pubmed and Web of Science. We searched observational studies that focused on risk factors of longer hospital stay at index admission in COPD inpatients. Terms used in search were: "Chronic obstructive pulmonary disease", "COPD", "hospitalization", "length of stay", "LOS", and "hospital stay". Published years ranged from 2000 to 2019. Study types included prospective study, retrospective study, cohort analysis or observational study. We also searched the references in retrieved papers for supplement studies that may be missed during the search

<sup>b</sup> In risk factor analysis, LOS was categorized into a binary variable.<sup>6,7,13</sup>

AECOPD=acute exacerbation of COPD; UK=United Kingdom; US=United States

### References

1. Ruparel M, Lopez-Campos JL, Castro-Acosta A, Hartl S, Pozo-Rodriguez F, Roberts CM. Understanding variation in length of hospital stay for COPD exacerbation: European COPD audit. *ERJ open research*. 2016;2(1).
2. Harries TH, Thornton HV, Crichton S, Schofield P, Gilkes A, White PT. Length of stay of COPD hospital admissions between 2006 and 2010: a retrospective longitudinal study. *International journal of chronic obstructive pulmonary disease*. 2015;10:603-611.

3. Agboado G, Peters J, Donkin L. Factors influencing the length of hospital stay among patients resident in Blackpool admitted with COPD: a cross-sectional study. *BMJ open*. 2012;2(5).
4. Holland M, Alkhalil M, Chandromouli S, Janjua A, Babores M. Eosinopenia as a marker of mortality and length of stay in patients admitted with exacerbations of chronic obstructive pulmonary disease. *Respirology (Carlton, Vic)*. 2010;15(1):165-167.
5. Ingadottir AR, Beck AM, Baldwin C, et al. Association of energy and protein intakes with length of stay, readmission and mortality in hospitalised patients with chronic obstructive pulmonary disease. *The British journal of nutrition*. 2018;119(5):543-551.
6. Wang Y, Stavem K, Dahl FA, Humerfelt S, Haugen T. Factors associated with a prolonged length of stay after acute exacerbation of chronic obstructive pulmonary disease (AECOPD). *International journal of chronic obstructive pulmonary disease*. 2014;9:99-105.
7. Vitacca M, Marino S, Comini L, Fezzardi L, Paneroni M. Bacterial Colonization in COPD Patients Admitted to a Rehabilitation Respiratory Unit and Impact on Length of Stay: A Real-Life Study. *Copd*. 2018;15(6):581-587.
8. Ferreira L, Moniz AC, Carneiro AS, et al. The impact of glycemic variability on length of stay and mortality in diabetic patients admitted with community-acquired pneumonia or chronic obstructive pulmonary disease. *Diabetes & metabolic syndrome*. 2019;13(1):149-153.
9. Quintana JM, Unzurrunzaga A, Garcia-Gutierrez S, et al. Predictors of Hospital Length of Stay in Patients with Exacerbations of COPD: A Cohort Study. *Journal of general internal medicine*. 2015;30(6):824-831.
10. Inabnit LS, Blanchette C, Ruban C. Comorbidities and length of stay in chronic obstructive pulmonary disease patients. *Copd*. 2018;15(4):355-360.
11. Rinne ST, Wong ES, Hebert PL, et al. Weekend Discharges and Length of Stay Among Veterans Admitted for Chronic Obstructive Pulmonary Disease. *Medical care*. 2015;53(9):753-757.
12. Parappil A, Depczynski B, Collett P, Marks GB. Effect of comorbid diabetes on length of stay and risk of death in patients admitted with acute exacerbations of COPD. *Respirology (Carlton, Vic)*. 2010;15(6):918-922.
13. Ko FWS, Chan KP, Ngai J, et al. Blood eosinophil count as a predictor of hospital length of stay in COPD exacerbations. *Respirology (Carlton, Vic)*. 2020;25(3):259-266.

- 1  
2  
3  
4  
5 14. Dai MY, Qiao JP, Xu YH, Fei GH. Respiratory infectious phenotypes in acute exacerbation of COPD: an aid to length of stay and COPD  
6 Assessment Test. *International journal of chronic obstructive pulmonary disease*. 2015;10:2257-2263.  
7  
8  
9  
10  
11  
12  
13  
14  
15  
16  
17  
18  
19  
20  
21  
22  
23  
24  
25  
26  
27  
28  
29  
30  
31  
32  
33  
34  
35  
36  
37  
38  
39  
40  
41  
42  
43  
44  
45  
46

For peer review only

# Reporting checklist for cohort study.

Based on the STROBE cohort guidelines.

## Instructions to authors

Complete this checklist by entering the page numbers from your manuscript where readers will find each of the items listed below.

Your article may not currently address all the items on the checklist. Please modify your text to include the missing information. If you are certain that an item does not apply, please write "n/a" and provide a short explanation.

Upload your completed checklist as an extra file when you submit to a journal.

In your methods section, say that you used the STROBE cohort reporting guidelines, and cite them as:

von Elm E, Altman DG, Egger M, Pocock SJ, Gøtzsche PC, Vandenbroucke JP. The Strengthening of Reporting of Observational Studies in Epidemiology (STROBE) Statement: guidelines for reporting observational studies.

|                           | Reporting Item                                                                                         | Page Number |
|---------------------------|--------------------------------------------------------------------------------------------------------|-------------|
| <b>Title and abstract</b> |                                                                                                        |             |
| Title                     | <a href="#">#1a</a> Indicate the study's design with a commonly used term in the title or the abstract | 1           |
| Abstract                  | <a href="#">#1b</a> Provide in the abstract an informative and                                         | 3           |



|    |                      |                     |                                                    |     |
|----|----------------------|---------------------|----------------------------------------------------|-----|
| 1  |                      |                     | balanced summary of what was done and what         |     |
| 2  |                      |                     | was found                                          |     |
| 3  |                      |                     |                                                    |     |
| 4  |                      |                     |                                                    |     |
| 5  |                      |                     |                                                    |     |
| 6  | <b>Introduction</b>  |                     |                                                    |     |
| 7  |                      |                     |                                                    |     |
| 8  |                      |                     |                                                    |     |
| 9  | Background /         | <a href="#">#2</a>  | Explain the scientific background and rationale    | 5   |
| 10 | rationale            |                     | for the investigation being reported               |     |
| 11 |                      |                     |                                                    |     |
| 12 |                      |                     |                                                    |     |
| 13 |                      |                     |                                                    |     |
| 14 | Objectives           | <a href="#">#3</a>  | State specific objectives, including any           | 6   |
| 15 |                      |                     | prespecified hypotheses                            |     |
| 16 |                      |                     |                                                    |     |
| 17 |                      |                     |                                                    |     |
| 18 |                      |                     |                                                    |     |
| 19 | <b>Methods</b>       |                     |                                                    |     |
| 20 |                      |                     |                                                    |     |
| 21 |                      |                     |                                                    |     |
| 22 |                      |                     |                                                    |     |
| 23 | Study design         | <a href="#">#4</a>  | Present key elements of study design early in      | 6   |
| 24 |                      |                     | the paper                                          |     |
| 25 |                      |                     |                                                    |     |
| 26 |                      |                     |                                                    |     |
| 27 |                      |                     |                                                    |     |
| 28 | Setting              | <a href="#">#5</a>  | Describe the setting, locations, and relevant      | 6   |
| 29 |                      |                     | dates, including periods of recruitment,           |     |
| 30 |                      |                     | exposure, follow-up, and data collection           |     |
| 31 |                      |                     |                                                    |     |
| 32 |                      |                     |                                                    |     |
| 33 |                      |                     |                                                    |     |
| 34 |                      |                     |                                                    |     |
| 35 | Eligibility criteria | <a href="#">#6a</a> | Give the eligibility criteria, and the sources and | 6   |
| 36 |                      |                     | methods of selection of participants. Describe     |     |
| 37 |                      |                     | methods of follow-up.                              |     |
| 38 |                      |                     |                                                    |     |
| 39 |                      |                     |                                                    |     |
| 40 |                      |                     |                                                    |     |
| 41 |                      |                     |                                                    |     |
| 42 |                      |                     |                                                    |     |
| 43 | Eligibility criteria | <a href="#">#6b</a> | For matched studies, give matching criteria and    | n/a |
| 44 |                      |                     | number of exposed and unexposed                    |     |
| 45 |                      |                     |                                                    |     |
| 46 |                      |                     |                                                    |     |
| 47 |                      |                     |                                                    |     |
| 48 | Variables            | <a href="#">#7</a>  | Clearly define all outcomes, exposures,            | 7-8 |
| 49 |                      |                     | predictors, potential confounders, and effect      |     |
| 50 |                      |                     | modifiers. Give diagnostic criteria, if applicable |     |
| 51 |                      |                     |                                                    |     |
| 52 |                      |                     |                                                    |     |
| 53 |                      |                     |                                                    |     |
| 54 |                      |                     |                                                    |     |
| 55 |                      |                     |                                                    |     |
| 56 | Data sources /       | <a href="#">#8</a>  | For each variable of interest give sources of      | 6-8 |
| 57 |                      |                     |                                                    |     |
| 58 |                      |                     |                                                    |     |
| 59 |                      |                     |                                                    |     |
| 60 |                      |                     |                                                    |     |

|    |              |                      |                                                   |                     |
|----|--------------|----------------------|---------------------------------------------------|---------------------|
| 1  | measurement  |                      | data and details of methods of assessment         |                     |
| 2  |              |                      | (measurement). Describe comparability of          |                     |
| 3  |              |                      | assessment methods if there is more than one      |                     |
| 4  |              |                      | group. Give information separately for for        |                     |
| 5  |              |                      | exposed and unexposed groups if applicable.       |                     |
| 6  |              |                      |                                                   |                     |
| 7  |              |                      |                                                   |                     |
| 8  |              |                      |                                                   |                     |
| 9  |              |                      |                                                   |                     |
| 10 |              |                      |                                                   |                     |
| 11 |              |                      |                                                   |                     |
| 12 | Bias         | <a href="#">#9</a>   | Describe any efforts to address potential         | 6                   |
| 13 |              |                      | sources of bias                                   |                     |
| 14 |              |                      |                                                   |                     |
| 15 |              |                      |                                                   |                     |
| 16 |              |                      |                                                   |                     |
| 17 |              |                      |                                                   |                     |
| 18 | Study size   | <a href="#">#10</a>  | Explain how the study size was arrived at         | n/a. In this        |
| 19 |              |                      |                                                   | retrospectively     |
| 20 |              |                      |                                                   | cohort, patients    |
| 21 |              |                      |                                                   | were                |
| 22 |              |                      |                                                   | consecutively       |
| 23 |              |                      |                                                   | admitted            |
| 24 |              |                      |                                                   |                     |
| 25 |              |                      |                                                   |                     |
| 26 |              |                      |                                                   |                     |
| 27 |              |                      |                                                   |                     |
| 28 |              |                      |                                                   |                     |
| 29 |              |                      |                                                   |                     |
| 30 |              |                      |                                                   |                     |
| 31 |              |                      |                                                   |                     |
| 32 | Quantitative | <a href="#">#11</a>  | Explain how quantitative variables were           | 7-8                 |
| 33 | variables    |                      | handled in the analyses. If applicable, describe  |                     |
| 34 |              |                      | which groupings were chosen, and why              |                     |
| 35 |              |                      |                                                   |                     |
| 36 |              |                      |                                                   |                     |
| 37 |              |                      |                                                   |                     |
| 38 |              |                      |                                                   |                     |
| 39 |              |                      |                                                   |                     |
| 40 | Statistical  | <a href="#">#12a</a> | Describe all statistical methods, including those | 8                   |
| 41 | methods      |                      | used to control for confounding                   |                     |
| 42 |              |                      |                                                   |                     |
| 43 |              |                      |                                                   |                     |
| 44 |              |                      |                                                   |                     |
| 45 | Statistical  | <a href="#">#12b</a> | Describe any methods used to examine              | n/a. In this study, |
| 46 | methods      |                      | subgroups and interactions                        | we studied          |
| 47 |              |                      |                                                   | potential factors   |
| 48 |              |                      |                                                   | related to length   |
| 49 |              |                      |                                                   | of stay in COPD     |
| 50 |              |                      |                                                   | patients            |
| 51 |              |                      |                                                   |                     |
| 52 |              |                      |                                                   |                     |
| 53 |              |                      |                                                   |                     |
| 54 |              |                      |                                                   |                     |
| 55 |              |                      |                                                   |                     |
| 56 |              |                      |                                                   |                     |
| 57 |              |                      |                                                   |                     |
| 58 |              |                      |                                                   |                     |
| 59 |              |                      |                                                   |                     |
| 60 |              |                      |                                                   |                     |

|    |                  |                      |                                                  |                  |
|----|------------------|----------------------|--------------------------------------------------|------------------|
| 1  | Statistical      | <a href="#">#12c</a> | Explain how missing data were addressed          | 23-24 Table 1    |
| 2  |                  |                      |                                                  |                  |
| 3  | methods          |                      |                                                  |                  |
| 4  |                  |                      |                                                  |                  |
| 5  |                  |                      |                                                  |                  |
| 6  | Statistical      | <a href="#">#12d</a> | If applicable, explain how loss to follow-up was |                  |
| 7  |                  |                      |                                                  |                  |
| 8  | methods          |                      | addressed                                        |                  |
| 9  |                  |                      |                                                  |                  |
| 10 |                  |                      |                                                  |                  |
| 11 | Statistical      | <a href="#">#12e</a> | Describe any sensitivity analyses                |                  |
| 12 |                  |                      |                                                  |                  |
| 13 | methods          |                      |                                                  |                  |
| 14 |                  |                      |                                                  |                  |
| 15 |                  |                      |                                                  |                  |
| 16 |                  |                      |                                                  |                  |
| 17 | <b>Results</b>   |                      |                                                  |                  |
| 18 |                  |                      |                                                  |                  |
| 19 |                  |                      |                                                  |                  |
| 20 | Participants     | <a href="#">#13a</a> | Report numbers of individuals at each stage of   | 9 Figure S1      |
| 21 |                  |                      | study—eg numbers potentially eligible,           |                  |
| 22 |                  |                      | examined for eligibility, confirmed eligible,    |                  |
| 23 |                  |                      | included in the study, completing follow-up,     |                  |
| 24 |                  |                      | and analysed. Give information separately for    |                  |
| 25 |                  |                      | for exposed and unexposed groups if              |                  |
| 26 |                  |                      | applicable.                                      |                  |
| 27 |                  |                      |                                                  |                  |
| 28 |                  |                      |                                                  |                  |
| 29 |                  |                      |                                                  |                  |
| 30 |                  |                      |                                                  |                  |
| 31 |                  |                      |                                                  |                  |
| 32 |                  |                      |                                                  |                  |
| 33 |                  |                      |                                                  |                  |
| 34 |                  |                      |                                                  |                  |
| 35 |                  |                      |                                                  |                  |
| 36 |                  |                      |                                                  |                  |
| 37 | Participants     | <a href="#">#13b</a> | Give reasons for non-participation at each       | 9 Figure S1      |
| 38 |                  |                      | stage                                            |                  |
| 39 |                  |                      |                                                  |                  |
| 40 |                  |                      |                                                  |                  |
| 41 |                  |                      |                                                  |                  |
| 42 | Participants     | <a href="#">#13c</a> | Consider use of a flow diagram                   | 9 Figure S1      |
| 43 |                  |                      |                                                  |                  |
| 44 |                  |                      |                                                  |                  |
| 45 | Descriptive data | <a href="#">#14a</a> | Give characteristics of study participants (eg   | 9, 23-24 Table 1 |
| 46 |                  |                      | demographic, clinical, social) and information   |                  |
| 47 |                  |                      | on exposures and potential confounders. Give     |                  |
| 48 |                  |                      | information separately for exposed and           |                  |
| 49 |                  |                      | unexposed groups if applicable.                  |                  |
| 50 |                  |                      |                                                  |                  |
| 51 |                  |                      |                                                  |                  |
| 52 |                  |                      |                                                  |                  |
| 53 |                  |                      |                                                  |                  |
| 54 |                  |                      |                                                  |                  |
| 55 |                  |                      |                                                  |                  |
| 56 |                  |                      |                                                  |                  |
| 57 | Descriptive data | <a href="#">#14b</a> | Indicate number of participants with missing     | 23-24 Table 1    |
| 58 |                  |                      |                                                  |                  |
| 59 |                  |                      |                                                  |                  |
| 60 |                  |                      |                                                  |                  |

data for each variable of interest

|    |                  |                                                                     |                     |
|----|------------------|---------------------------------------------------------------------|---------------------|
| 1  |                  |                                                                     |                     |
| 2  |                  |                                                                     |                     |
| 3  |                  |                                                                     |                     |
| 4  | Descriptive data | <a href="#">#14c</a> Summarise follow-up time (eg, average and      | 7, hospital stay at |
| 5  |                  | total amount)                                                       | the initial         |
| 6  |                  |                                                                     | admission was       |
| 7  |                  |                                                                     | the follow-up       |
| 8  |                  |                                                                     | time                |
| 9  |                  |                                                                     |                     |
| 10 |                  |                                                                     |                     |
| 11 |                  |                                                                     |                     |
| 12 |                  |                                                                     |                     |
| 13 |                  |                                                                     |                     |
| 14 |                  |                                                                     |                     |
| 15 | Outcome data     | <a href="#">#15</a> Report numbers of outcome events or             | 9, 23-24 Table 1    |
| 16 |                  | summary measures over time. Give information                        |                     |
| 17 |                  | separately for exposed and unexposed groups                         |                     |
| 18 |                  | if applicable.                                                      |                     |
| 19 |                  |                                                                     |                     |
| 20 |                  |                                                                     |                     |
| 21 |                  |                                                                     |                     |
| 22 |                  |                                                                     |                     |
| 23 |                  |                                                                     |                     |
| 24 |                  |                                                                     |                     |
| 25 | Main results     | <a href="#">#16a</a> Give unadjusted estimates and, if applicable,  | 10, 25-27 Table     |
| 26 |                  | confounder-adjusted estimates and their                             | 2-3                 |
| 27 |                  | precision (eg, 95% confidence interval). Make                       |                     |
| 28 |                  | clear which confounders were adjusted for and                       |                     |
| 29 |                  | why they were included                                              |                     |
| 30 |                  |                                                                     |                     |
| 31 |                  |                                                                     |                     |
| 32 |                  |                                                                     |                     |
| 33 |                  |                                                                     |                     |
| 34 |                  |                                                                     |                     |
| 35 |                  |                                                                     |                     |
| 36 |                  |                                                                     |                     |
| 37 |                  |                                                                     |                     |
| 38 | Main results     | <a href="#">#16b</a> Report category boundaries when continuous     | 10 Figure 2         |
| 39 |                  | variables were categorized                                          |                     |
| 40 |                  |                                                                     |                     |
| 41 |                  |                                                                     |                     |
| 42 |                  |                                                                     |                     |
| 43 | Main results     | <a href="#">#16c</a> If relevant, consider translating estimates of | n/a. Relative risk  |
| 44 |                  | relative risk into absolute risk for a meaningful                   | was the main        |
| 45 |                  | time period                                                         | indicator for       |
| 46 |                  |                                                                     | length of stay in   |
| 47 |                  |                                                                     | this paper          |
| 48 |                  |                                                                     |                     |
| 49 |                  |                                                                     |                     |
| 50 |                  |                                                                     |                     |
| 51 |                  |                                                                     |                     |
| 52 |                  |                                                                     |                     |
| 53 |                  |                                                                     |                     |
| 54 |                  |                                                                     |                     |
| 55 | Other analyses   | <a href="#">#17</a> Report other analyses done—e.g., analyses of    | n/a. This study     |
| 56 |                  | subgroups and interactions, and sensitivity                         | focused on the      |
| 57 |                  |                                                                     |                     |
| 58 |                  |                                                                     |                     |
| 59 |                  |                                                                     |                     |
| 60 |                  |                                                                     |                     |

analyses

potential factors

associated with

prolonged

hospital stay in

COPD patients

## Discussion

|                          |                     |                                                                                                                                                                  |           |
|--------------------------|---------------------|------------------------------------------------------------------------------------------------------------------------------------------------------------------|-----------|
| Key results              | <a href="#">#18</a> | Summarise key results with reference to study objectives                                                                                                         | 11        |
| Limitations              | <a href="#">#19</a> | Discuss limitations of the study, taking into account sources of potential bias or imprecision. Discuss both direction and magnitude of any potential bias.      | 14        |
| Interpretation           | <a href="#">#20</a> | Give a cautious overall interpretation considering objectives, limitations, multiplicity of analyses, results from similar studies, and other relevant evidence. | 11-12, 14 |
| Generalisability         | <a href="#">#21</a> | Discuss the generalisability (external validity) of the study results                                                                                            | 13-14     |
| <b>Other Information</b> |                     |                                                                                                                                                                  |           |
| Funding                  | <a href="#">#22</a> | Give the source of funding and the role of the funders for the present study and, if applicable, for the original study on which the present                     | 16        |

1 article is based  
2  
3

4 None The STROBE checklist is distributed under the terms of the Creative Commons Attribution  
5 License CC-BY. This checklist can be completed online using <https://www.goodreports.org/>, a tool  
6 made by the [EQUATOR Network](#) in collaboration with [Penelope.ai](#)  
7  
8  
9  
10  
11  
12  
13  
14  
15  
16  
17  
18  
19  
20  
21  
22  
23  
24  
25  
26  
27  
28  
29  
30  
31  
32  
33  
34  
35  
36  
37  
38  
39  
40  
41  
42  
43  
44  
45  
46  
47  
48  
49  
50  
51  
52  
53  
54  
55  
56  
57  
58  
59  
60
