# Supplementary material for: Factors associated with inpatient length of stay among hospitalised patients with chronic obstructive pulmonary disease, China, 2016–2017: a retrospective study
Source: PubMed Central journal article supplement — BMJ Open. 2021 Feb 5;11(2):e040560. doi: 10.1136/bmjopen-2020-040560 (PMC7925858; doi:10.1136/bmjopen-2020-040560), 2021-02-05
Supplement: bmjopen-2020-040560supp001.pdf [file bmjopen-2020-040560supp001.pdf]

## SUPPLEMENTARY INFORMATION

### Factors Associated with Inpatient Length of Stay among Hospitalized Patients with Chronic Obstructive Pulmonary Disease, China, 2016-2017: a retrospective study

Fen Dong<sup>1,2,3</sup>, Ke Huang<sup>2,3,4</sup>, Xiaoxia Ren<sup>2,3,4</sup>, Shiwei Qumu<sup>2,3,4</sup>, Hongtao Niu<sup>2,3,4</sup>, Yanyan Wang<sup>5</sup>, Yong Li<sup>2,3,4</sup>, Minya Lu<sup>6</sup>, Xinshan Lin<sup>2,3,4,7</sup>, Ting Yang<sup>2,3,4\*</sup>, Jianjun Jiao<sup>8\*</sup>, Chen Wang<sup>2,3,4,9</sup>

\***Co-corresponding authors:** Ting Yang and Jianjun Jiao contributed equally to this paper as co-corresponding authors.

#### **Affiliations:**

<sup>1</sup>Institute of Clinical Medical Sciences, China–Japan Friendship Hospital, Beijing, China; <sup>2</sup>Department of Pulmonary and Critical Care Medicine, China-Japan Friendship Hospital, Beijing, China;

<sup>3</sup>National Clinical Research Center for Respiratory Diseases, Beijing, China;

<sup>4</sup>Institute of Respiratory Medicine, Chinese Academy of Medical Science, Beijing, China;

<sup>5</sup>Department of Medical Records, China–Japan Friendship Hospital, Beijing, China;

<sup>6</sup>Department of Clinical Laboratory, Peking Union Medical College Hospital, Chinese Academy of Medical Sciences, Beijing, China;

<sup>7</sup>Graduate School of Peking Union Medical College, Chinese Academy of Medical Sciences & Peking Union Medical College, Beijing, China;

<sup>8</sup>Department of Medical Administration, China–Japan Friendship Hospital, Beijing, China;

<sup>9</sup>Chinese Academy of Medical Sciences & Peking Union Medical College, Beijing, China.

**Supplementary** Figure S1- Flow chart of data cleaning process

**Supplementary** Table S1- Observational studies on LOS and risk factors in patients admitted for COPD

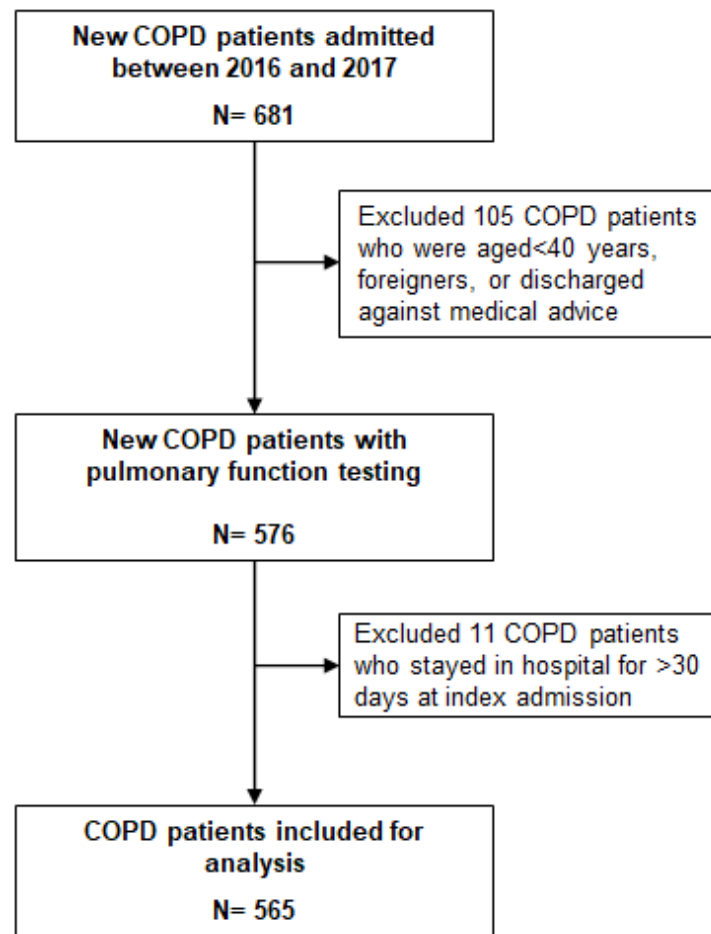

Figure S1- Flow chart of data cleaning process

**Table S1. Observational studies on LOS and risk factors in patients admitted for COPD <sup>a</sup>**

| Countries/regions                        | Years for LOS                 | Study patients                                                                                            | LOS                                                                | Risk factors for longer LOS                                                                                                                                                           |
|------------------------------------------|-------------------------------|-----------------------------------------------------------------------------------------------------------|--------------------------------------------------------------------|---------------------------------------------------------------------------------------------------------------------------------------------------------------------------------------|
| Thirteen European countries <sup>1</sup> | Oct.-Dec.2010; Jan.-Feb. 2011 | Exacerbated COPD patients in Europe                                                                       | Median (IQR): 7 (4-11) days                                        | Clinical severity, treatment                                                                                                                                                          |
| UK <sup>2-5</sup>                        | 2006-2010                     | COPD patients registered with London general practitioners aged ≥45 years                                 | Mean: 8.2 days in 2006 and 7 days in 2010                          | Age, hospital and community factors                                                                                                                                                   |
|                                          | Apr.1st, 2005- Mar.31st, 2010 | COPD patients aged ≥40 years in Blackpool, UK                                                             | Median: 6 days<br>Mean: 9.8 days                                   | Age, deprivation, Charlson index, specialty of admission, and cause of exacerbations                                                                                                  |
|                                          | Mar. 2007- Apr. 2008          | 65 AECOPD patients                                                                                        | Median: 5 (1-27) in normal eosinophils and 8 (2-61) in eosinopenia | Eosinopenia                                                                                                                                                                           |
|                                          | Mar. 2015-Mar. 2016           | 99 COPD patients admitted to department of pulmonary medicine at Landspítali National University hospital | 9 days                                                             | No clear association between energy or protein intake and LOS                                                                                                                         |
| Norway <sup>6</sup>                      | March 2006-December 2008      | Patients discharged after COPD at Oslo University hospital in Norway                                      | Median: 6 (3.5-11) days                                            | Admission between Thursday and Saturday, heart failure, diabetes, stroke, high arterial PCO <sub>2</sub> , and low serum albumin level were associated with LOS>11 days. <sup>b</sup> |

| Countries/regions       | Years for LOS                   | Study patients                                                      | LOS                                                                                                   | Risk factors for longer LOS                                                                                                   |
|-------------------------|---------------------------------|---------------------------------------------------------------------|-------------------------------------------------------------------------------------------------------|-------------------------------------------------------------------------------------------------------------------------------|
| Italy <sup>7</sup>      | 2010                            | 269 COPD patients in a respiratory rehabilitation unit in Italy     | Mean ±SD: 31±17 days                                                                                  | Comorbidity, age, invasive procedure, disability, admission provenance predicted longer stay (≥ 30 days) <sup>b</sup>         |
| Portugal <sup>8</sup>   | Jan-Jun., 2016                  | 242 diabetic patients with AECOPD or community acquired pneumonia   | Median: 10 days (min-max, 1-66)                                                                       | LOS was positively correlated with glycemic variability                                                                       |
| Spain <sup>9</sup>      | Jun. 2008-Sep. 2010             | AECOPD patients visiting emergency department in Spain              | -                                                                                                     | Baseline dyspnea, physical activity level, and hospital variability                                                           |
| US <sup>10,11</sup>     | Jan. 1st, -Dec. 31st, 2016      | 3399 COPD patients with LOS ≤60 days in Premier healthcare database | Mean ± SD: 11.64±9.40 days                                                                            | Comorbidity (congestive heart failure, fluid and electrolyte disorders, renal failure) were associated with longer stay       |
|                         | Oct. 1st, 2008- Sep. 30th, 2010 | 25301 COPD patients admitted to veteran affairs health care system  | Mean ± SD: 4.2±2.7 days for weekend discharged patients, 5.4±4.9 days for weekday discharged patients | Fewer weekend discharges was associated with longer stay.                                                                     |
| Australia <sup>12</sup> | 2007                            | 172 AECOPD patients                                                 | 7.8 days in patients with diabetes, 6.5 days in patients without diabetes                             | Patients with diabetes had increased LOS, but differences were not statistically significant after adjustment for covariates. |
| China <sup>13,14</sup>  | Mar. 2013-Aug.2016              | 346 AECOPD patients in a tertiary hospital in Hongkong, China       | Median (IQR): 5 (7) days                                                                              | An eosinophil value of <0.144 × 10 <sup>9</sup> /L on admission or <2% was associated with                                    |

| Countries/regions | Years for LOS      | Study patients                                             | LOS                               | Risk factors for longer LOS                                  |
|-------------------|--------------------|------------------------------------------------------------|-----------------------------------|--------------------------------------------------------------|
|                   |                    |                                                            |                                   | longer hospital LOS ( $\geq 5$ days) for AECOPD <sup>b</sup> |
|                   | January-June, 2014 | 81 exacerbated COPD patients in a hospital in Anhui, China | Mean $\pm$ SD: 9.6 $\pm$ 4.1 days | Respiratory infection was associated with LOS                |

<sup>a</sup> we conducted a literature review by searching literatures in the following database: Medline, Embase, Pubmed and Web of Science. We searched observational studies that focused on risk factors of longer hospital stay at index admission in COPD inpatients. Terms used in search were: "Chronic obstructive pulmonary disease", "COPD", "hospitalization", "length of stay", "LOS", and "hospital stay". Published years ranged from 2000 to 2019. Study types included prospective study, retrospective study, cohort analysis or observational study. We also searched the references in retrieved papers for supplement studies that may be missed during the search

<sup>b</sup> In risk factor analysis, LOS was categorized into a binary variable.<sup>6,7,13</sup>

AECOPD=acute exacerbation of COPD; UK=United Kingdom; US=United States

### References

1. Ruparel M, Lopez-Campos JL, Castro-Acosta A, Hartl S, Pozo-Rodriguez F, Roberts CM. Understanding variation in length of hospital stay for COPD exacerbation: European COPD audit. *ERJ open research*. 2016;2(1).
2. Harries TH, Thornton HV, Crichton S, Schofield P, Gilkes A, White PT. Length of stay of COPD hospital admissions between 2006 and 2010: a retrospective longitudinal study. *International journal of chronic obstructive pulmonary disease*. 2015;10:603-611.

3. Agboado G, Peters J, Donkin L. Factors influencing the length of hospital stay among patients resident in Blackpool admitted with COPD: a cross-sectional study. *BMJ open*. 2012;2(5).
4. Holland M, Alkhalil M, Chandromouli S, Janjua A, Babores M. Eosinopenia as a marker of mortality and length of stay in patients admitted with exacerbations of chronic obstructive pulmonary disease. *Respirology (Carlton, Vic)*. 2010;15(1):165-167.
5. Ingadottir AR, Beck AM, Baldwin C, et al. Association of energy and protein intakes with length of stay, readmission and mortality in hospitalised patients with chronic obstructive pulmonary disease. *The British journal of nutrition*. 2018;119(5):543-551.
6. Wang Y, Stavem K, Dahl FA, Humerfelt S, Haugen T. Factors associated with a prolonged length of stay after acute exacerbation of chronic obstructive pulmonary disease (AECOPD). *International journal of chronic obstructive pulmonary disease*. 2014;9:99-105.
7. Vitacca M, Marino S, Comini L, Fezzardi L, Paneroni M. Bacterial Colonization in COPD Patients Admitted to a Rehabilitation Respiratory Unit and Impact on Length of Stay: A Real-Life Study. *Copd*. 2018;15(6):581-587.
8. Ferreira L, Moniz AC, Carneiro AS, et al. The impact of glycemic variability on length of stay and mortality in diabetic patients admitted with community-acquired pneumonia or chronic obstructive pulmonary disease. *Diabetes & metabolic syndrome*. 2019;13(1):149-153.
9. Quintana JM, Unzurrunzaga A, Garcia-Gutierrez S, et al. Predictors of Hospital Length of Stay in Patients with Exacerbations of COPD: A Cohort Study. *Journal of general internal medicine*. 2015;30(6):824-831.
10. Inabnit LS, Blanchette C, Ruban C. Comorbidities and length of stay in chronic obstructive pulmonary disease patients. *Copd*. 2018;15(4):355-360.
11. Rinne ST, Wong ES, Hebert PL, et al. Weekend Discharges and Length of Stay Among Veterans Admitted for Chronic Obstructive Pulmonary Disease. *Medical care*. 2015;53(9):753-757.
12. Parappil A, Depczynski B, Collett P, Marks GB. Effect of comorbid diabetes on length of stay and risk of death in patients admitted with acute exacerbations of COPD. *Respirology (Carlton, Vic)*. 2010;15(6):918-922.
13. Ko FWS, Chan KP, Ngai J, et al. Blood eosinophil count as a predictor of hospital length of stay in COPD exacerbations. *Respirology (Carlton, Vic)*. 2020;25(3):259-266.

14. Dai MY, Qiao JP, Xu YH, Fei GH. Respiratory infectious phenotypes in acute exacerbation of COPD: an aid to length of stay and COPD Assessment Test. *International journal of chronic obstructive pulmonary disease*. 2015;10:2257-2263.
